# Supplementary material for: Assembling a Cinnamyl Pharmacophore in the C3-Position of Substituted Isatins via Microwave-Assisted Synthesis: Development of a New Class of Monoamine Oxidase-B Inhibitors for the Treatment of Parkinson’s Disease
Source: MDPI journal article supplement (doi:10.3390/molecules28166167), 2023-08-21
Supplement: s1 [file s1]

# Supporting Information

## Assembling a cinnamyl pharmacophore in the C3-position of substituted isatins via microwave-assisted synthesis: Development of a new class of monoamine oxidase-B inhibitors for the treatment of Parkinson's disease

Amritha Manoharan <sup>1,‡</sup>, Jong Min Oh <sup>2,‡</sup>, Feba Benny <sup>1</sup>, Sunil Kumar <sup>1</sup>, Mohamed A. Abdelgawad <sup>3,4</sup>, Mohammed M. Ghoneim <sup>5,6</sup>, Mohamed E. Shaker <sup>7,8</sup>, Mohamed El-Sherbiny <sup>9,10</sup>, Hailah M. Almohaimeed <sup>11</sup>, Prashant Gahtori <sup>12</sup>, Hoon Kim <sup>2,\*</sup> and Bijomathew <sup>1,\*</sup>

<sup>1</sup> Department of Pharmaceutical Chemistry, Amrita School of Pharmacy, Amrita Vishwa Vidyapeetham, AIMS Health Sciences Campus, Kochi, 682 041 India; manoharanamritha99@gmail.com (A.M.); febabenny@gmail.com (F.B.); solankimedchem@gmail.com (S.K.)

<sup>2</sup> Department of Pharmacy, and Research Institute of Life Pharmaceutical Sciences, Sunchon National University, Suncheon 57922, Republic of Korea ; ddazzo005@naver.com (J.M.O.)

<sup>3</sup> Department of Pharmaceutical Chemistry, College of Pharmacy, Jouf University, Sakaka 72341, Saudi Arabia; mhmdgwd@ju.edu.sa (M.A.A)

<sup>4</sup> Pharmaceutical Organic Chemistry Department, Faculty of Pharmacy, Beni-Suef University, Beni suef 62514, Egypt

<sup>5</sup> Department of Pharmacy Practice, College of Pharmacy, AlMaarefa University, Ad Diriyah 13713, Saudi Arabia; mghoneim@um.edu.sa (M.M.G.)

<sup>6</sup> Pharmacognosy and Medicinal Plants Department, Faculty of Pharmacy, Al-Azhar University, Cairo 11884, Egypt

<sup>7</sup> Department of Pharmacology, College of Pharmacy, Jouf University, Sakaka 72341, Aljof, Saudi Arabia; melsayed@ju.edu.sa (M.E.S.)

<sup>8</sup> Department of Pharmacology & Toxicology, Faculty of Pharmacy, Mansoura University, Mansoura 35516, Egypt

<sup>9</sup> Department of Basic Medical Sciences, College of Medicine, AlMaarefa University, P.O. Box 71666, Riyadh 11597, Saudi Arabia; msharbini@mcst.edu.sa (M.E.-S.)

<sup>10</sup> Department of Anatomy, Faculty of Medicine, Mansoura University, Mansoura 35516, Egypt

<sup>11</sup> Department of Basic Science , College of Medicine ,Princess Nourah bint Abdulrahman University ,P.O.Box 84428, Riyadh 11671, Saudi Arabia; hmalmoaimeed@pnu.edu.sa (H.M.A)

<sup>12</sup> School of Pharmacy, Graphic Era Hill University, Dehradun 248002, Uttarakhand, India; pgahtori@gehu.ac.in (P.G.)

<sup>‡</sup>Authors contributed equally to this work.

<sup>\*</sup> Correspondence: bijomathew@aims.amrita.edu or bijovilaventgu@gmail.com (B.M.); hoon@sunchon.ac.kr (H.K.)

## Table of Contents

|                                         |            |
|-----------------------------------------|------------|
| <b>Figure S1. IHC-1 Structure.....</b>  | <b>S1</b>  |
| 1. IHC-1                                |            |
| 1.1 TLC of IHC-1                        |            |
| 1.2. <sup>1</sup> H-NMR of IHC-1        |            |
| 1.3. <sup>13</sup> C-NMR of IHC-1       |            |
| 1.4. Mass Spectrum of IHC-1             |            |
| 1.5. Spectral interpretation of IHC-1   |            |
| <b>Figure S2. IHC-2 Structure.....</b>  | <b>S3</b>  |
| 2. IHC-2 structure                      |            |
| 2.1 TLC of IHC-2                        |            |
| 2.2. <sup>1</sup> H-NMR of IHC-2        |            |
| 2.3. <sup>13</sup> C-NMR of IHC-2       |            |
| 2.4. Mass Spectrum of IHC-2             |            |
| 2.5. Spectral interpretation of IHC-2   |            |
| <b>Figure S3. IHC-3 Structure.....</b>  | <b>S5</b>  |
| 3. IHC-3 structure                      |            |
| 3.1 TLC of IHC-3                        |            |
| 3.2. <sup>1</sup> H-NMR of IHC-3        |            |
| 3.3. <sup>13</sup> C-NMR of IHC-3       |            |
| 3.4. Mass Spectrum of IHC-3             |            |
| 3.5. Spectral interpretation of IHC-3   |            |
| <b>Figure S4. IHC-4 Structure.....</b>  | <b>S7</b>  |
| 4. IHC-4 structure                      |            |
| 4.1 TLC of IHC-4                        |            |
| 4.2. <sup>1</sup> H-NMR of IHC-4        |            |
| 4.3. <sup>13</sup> C-NMR of IHC-4       |            |
| 4.4. Mass Spectrum of IHC-4             |            |
| 4.5. Spectral interpretation of IHC-4   |            |
| <b>Figure S5. IHC-5 Structure.....</b>  | <b>S9</b>  |
| 5. IHC-5 structure                      |            |
| 5.1 TLC of IHC-5                        |            |
| 5.2. <sup>1</sup> H-NMR of IHC-5        |            |
| 5.3. <sup>13</sup> C-NMR of IHC-5       |            |
| 5.4. Mass Spectrum of IHC-5             |            |
| 5.5. Spectral interpretation of IHC-5   |            |
| <b>Figure S6. IHC-6 Structure.....</b>  | <b>S11</b> |
| 6. IHC-6 structure                      |            |
| 6.1 TLC of IHC-6                        |            |
| 6.2. <sup>1</sup> H-NMR of IHC-6        |            |
| 6.3. <sup>13</sup> C-NMR of IHC-6       |            |
| 6.4. Mass Spectrum of IHC-6             |            |
| 6.5. Spectral interpretation of IHC-6   |            |
| <b>Figure S7. IHMC-1 Structure.....</b> | <b>S13</b> |
| 7. IHMC-1 structure                     |            |
| 7.1 TLC of IHMC-1                       |            |
| 7.2. <sup>1</sup> H-NMR of IHMC-1       |            |
| 7.3. <sup>13</sup> C-NMR of IHMC-1      |            |
| 7.4. Mass Spectrum of IHMC-1            |            |
| 7.5. Spectral interpretation of IHMC-1  |            |

|                                          |            |
|------------------------------------------|------------|
| <b>Figure S8. IHMC-2 Structure.....</b>  | <b>S15</b> |
| 8. IHMC-2 structure                      |            |
| 8.1 TLC of IHMC-2                        |            |
| 8.2. <sup>1</sup> H-NMR of IHMC-2        |            |
| 8.3. <sup>13</sup> C-NMR of IHMC-2       |            |
| 8.4. Mass Spectrum of IHMC-2             |            |
| 8.5. Spectral interpretation of IHMC-2   |            |
| <b>Figure S9. IHMC-3 Structure.....</b>  | <b>S17</b> |
| 9. IHMC-3 structure                      |            |
| 9.1 TLC of IHMC-3                        |            |
| 9.2. <sup>1</sup> H-NMR of IHMC-3        |            |
| 9.3. <sup>13</sup> C-NMR of IHMC-3       |            |
| 9.4. Mass Spectrum of IHMC-3             |            |
| 9.5. Spectral interpretation of IHMC-3   |            |
| <b>Figure S10. IHMC-4 Structure.....</b> | <b>S19</b> |
| 10. IHMC-4 structure                     |            |
| 10.1 TLC of IHMC-4                       |            |
| 10.2. <sup>1</sup> H-NMR of IHMC-4       |            |
| 10.3. <sup>13</sup> C-NMR of IHMC-4      |            |
| 10.4. Mass Spectrum of IHMC-4            |            |
| 10.5. Spectral interpretation of IHMC-4  |            |
| <b>Figure S11. IHMC-5 Structure.....</b> | <b>S21</b> |
| 11. IHMC-5 structure                     |            |
| 11.1 TLC of IHMC-5                       |            |
| 11.2. <sup>1</sup> H-NMR of IHMC-5       |            |
| 11.3. <sup>13</sup> C-NMR of IHMC-5      |            |
| 11.4. Mass Spectrum of IHMC-5            |            |
| 11.5. Spectral interpretation of IHMC-5  |            |
| <b>Figure S12. IHMC-6 Structure.....</b> | <b>S23</b> |
| 12. IHMC-6 structure                     |            |
| 12.1 TLC of IHMC-6                       |            |
| 12.2. <sup>1</sup> H-NMR of IHMC-6       |            |
| 12.3. <sup>13</sup> C-NMR of IHMC-6      |            |
| 12.4. Mass Spectrum of IHMC-6            |            |
| 12.5. Spectral interpretation of IHMC-6  |            |
| <b>Figure S13. IHNC-1 Structure.....</b> | <b>S25</b> |
| 13. IHNC-1 structure                     |            |
| 13.1 TLC of IHNC-1                       |            |
| 13.2. <sup>1</sup> H-NMR of IHNC-1       |            |
| 13.3. <sup>13</sup> C-NMR of IHNC-1      |            |
| 13.4. Mass Spectrum of IHNC-1            |            |
| 13.5. Spectral interpretation of IHNC-1  |            |
| <b>Figure S14. IHNC-2 Structure.....</b> | <b>S27</b> |
| 14. IHNC-2 structure                     |            |
| 14.1 TLC of IHNC-2                       |            |
| 14.2. <sup>1</sup> H-NMR of IHNC-2       |            |
| 14.3. <sup>13</sup> C-NMR of IHNC-2      |            |
| 14.4. Mass Spectrum of IHNC-2            |            |
| 14.5. Spectral interpretation of IHNC-2  |            |
| <b>Figure S15. IHNC-3 Structure.....</b> | <b>S29</b> |

- 15. IHNC-3 structure
- 15.1 TLC of IHNC-3
- 15.2.  $^1\text{H}$ -NMR of IHNC-3
- 15.3.  $^{13}\text{C}$ -NMR of IHNC-3
- 15.4. Mass Spectrum of IHNC-3
- 15.5. Spectral interpretation of IHNC-3

**Figure S16. IHNC-4 Structure..... S31**

- 16. IHNC-4 structure
- 16.1 TLC of IHNC-4
- 16.2.  $^1\text{H}$ -NMR of IHNC-4
- 16.3.  $^{13}\text{C}$ -NMR of IHNC-4
- 16.4. Mass Spectrum of IHNC-4
- 16.5. Spectral interpretation of IHNC-4

**Figure S17. IHNC-5 Structure..... S33**

- 17. IHNC-5 structure
- 17.1 TLC of IHNC-5
- 17.2.  $^1\text{H}$ -NMR of IHNC-5
- 17.3.  $^{13}\text{C}$ -NMR of IHNC-5
- 17.4. Mass Spectrum of IHNC-5
- 17.5. Spectral interpretation of IHNC-5

**Figure S18. IHNC-6 Structure..... S35**

- 18. IHNC-6 structure
- 18.1 TLC of IHNC-6
- 18.2.  $^1\text{H}$ -NMR of IHNC-6
- 18.3.  $^{13}\text{C}$ -NMR of IHNC-6
- 18.4. Mass Spectrum of IHNC-6
- 18.5. Spectral interpretation of IHNC-6

**Figure S19. MAO-B kinetics ..... S37**



## Figure S1. IHC-1 Structure

### 1. IHC-1

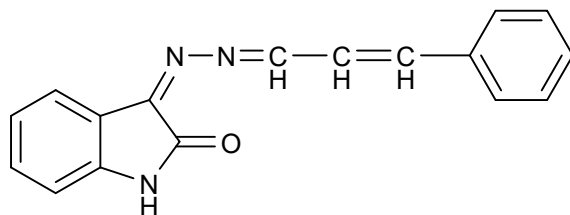

### 1.1 TLC OF IHC-1

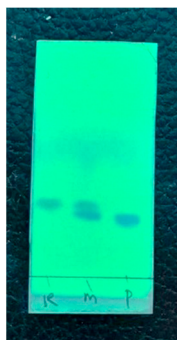

R = Reactant, M = Mixture, P = Product

### 1.2. <sup>1</sup>H NMR SPECTRUM OF IHC-1

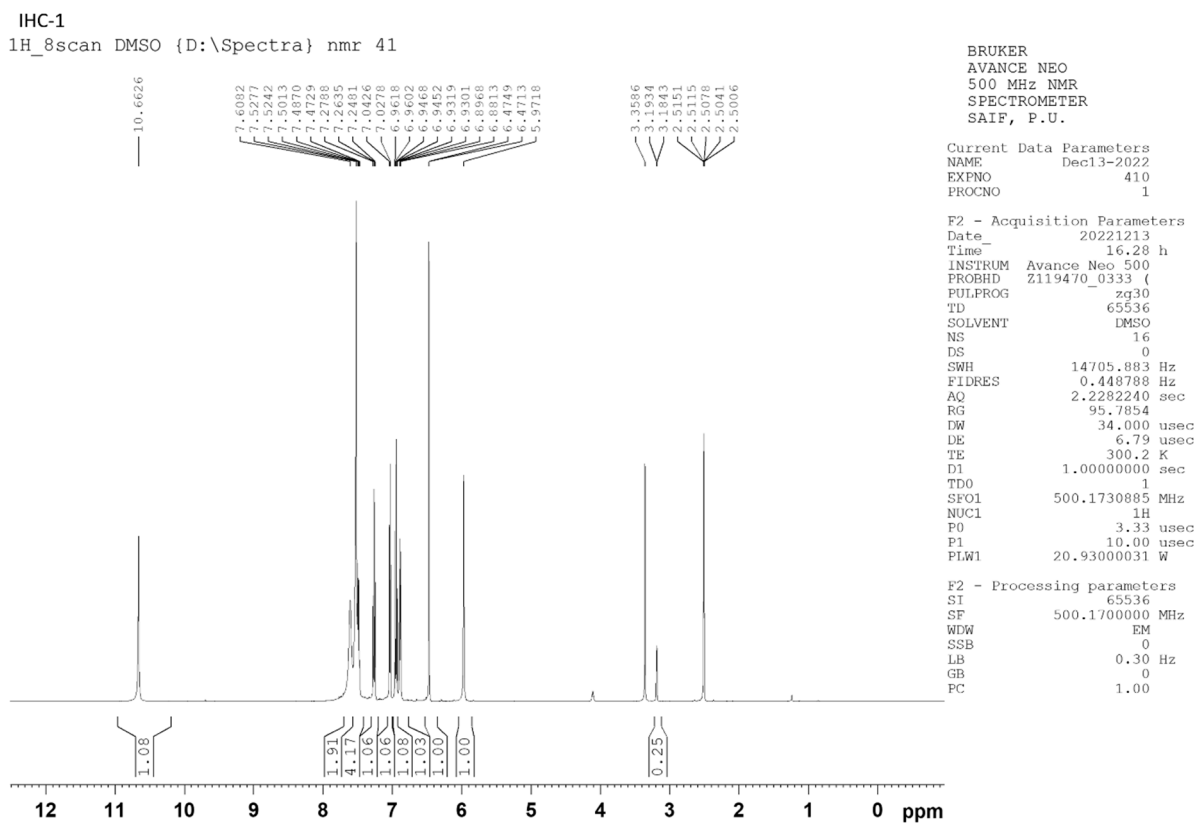

### 1.3. <sup>13</sup>C NMR OF IHC-1

#### IHC-1

U13CPD DMSO {D:\Spectra} nmr 41

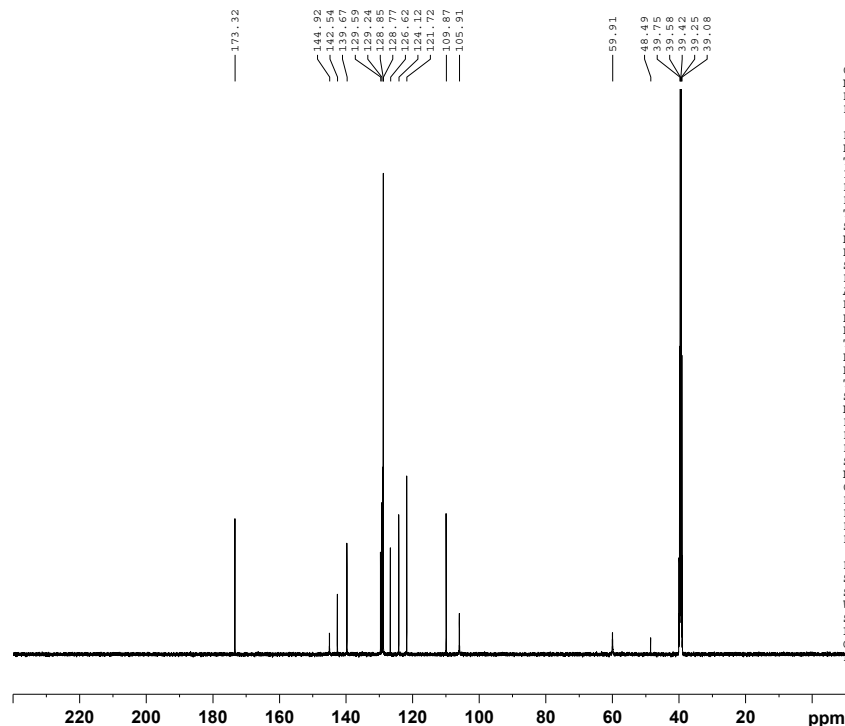

BRUKER  
AVANCE NEO  
500 MHz NMR SPECTROMETER  
SAIF, PANJAB UNIVERSITY,  
CHANDIGARH

Current Data Parameters  
NAME Dec13-2022  
EXPNO 411  
PROCNO 1

F2 - Acquisition Parameters  
Date\_ 20221214  
Time 1.53 h  
INSTRUM Avance Neo 500  
PROBHD Z119470\_0333 (  
PULPROG zgpg30  
TD 65536  
SOLVENT DMSO  
NS 512  
DS 4  
SWH 37037.035 Hz  
FIDRES 1.130281 Hz  
AQ 0.8847360 sec  
RG 101  
DW 13.500 usec  
DE 6.50 usec  
TE 300.1 K  
D1 2.00000000 sec  
D11 0.03000000 sec  
TD0 1  
SFO1 125.7804233 MHz  
NUC1 13C  
P0 3.33 usec  
P1 10.00 usec  
PLW1 83.14099884 W  
SFO2 500.1720007 MHz  
NUC2 1H  
CPDPRG2 waltz65  
PCPD2 80.00 usec  
PLW2 20.93000031 W  
PLW12 0.32703000 W  
PLW13 0.16449000 W

F2 - Processing parameters  
SI 32768  
SF 125.7679208 MHz  
WDW EM  
SSB 0  
LB 1.00 Hz  
GB 0  
PC 1.40

### 1.4. MASS SPECTRUM OF IHC-1

IHC1

Scan: 504 TIC=8003024 Base=75%FS #Ions=512 RT=13.62

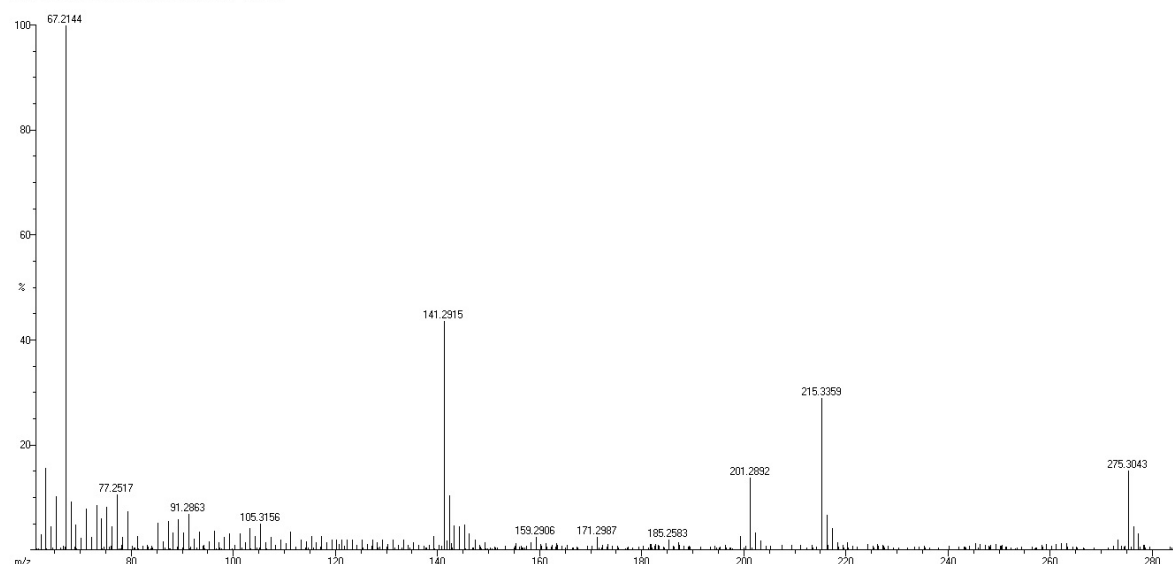

### 1.5. SPECTRAL INTERPRETATION

**(3Z)-3-((3-phenylallylidene)hydrazineylidene)indolin-2-one(IHC-1):** <sup>1</sup>H NMR (500 MHz, DMSO) δ 10.66 (s, 1H, NH), 7.61-6.95(m, 9H, Ar-H), 6.89(d, 1H, =CH-), 6.47(d, 1H -CH-), 5.97(s, 1H, -CH-). <sup>13</sup>C NMR (500 MHz, DMSO) δ: 173.32, 144.72, 142.54, 139.67, 129.59, 129.24, 128.85, 128.77, 126.62, 124.14, 121.72, 109.87, 105.91, 54.91, 48.49, 39.75, 39.08. Molecular formula: C<sub>17</sub>H<sub>13</sub>N<sub>3</sub>O, (HRMS)Calculated Mol.wt. = 275.30462, observed Mol.wt.= 275.3043.

## Figure S2. IHC-2 Structure

### 2.IHC-2

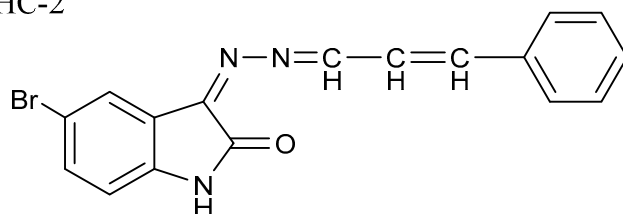

### 2.1. TLC OF IHC-2

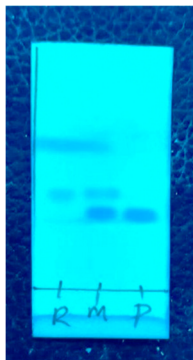

R = Reactant, M= Mixture, P = Product

### 2.2. <sup>1</sup>H NMR OF IHC-2

IHC-2  
1H\_8scan DMSO {D:\Spectra} nmr 42

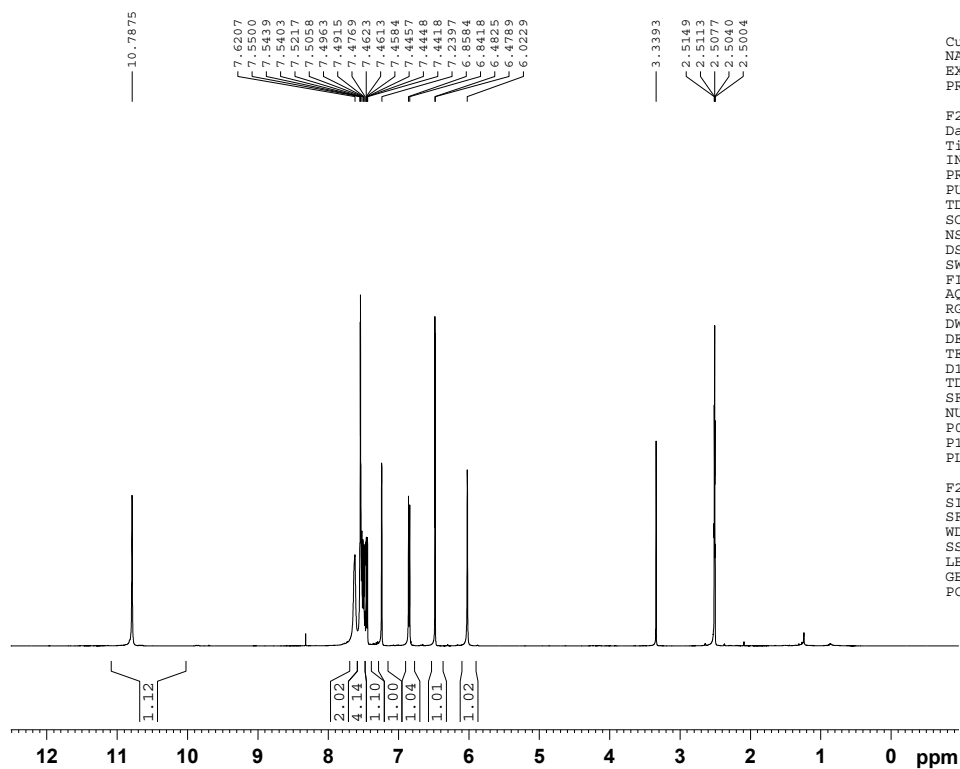

BRUKER  
AVANCE NEO  
500 MHz NMR  
SPECTROMETER  
SAIF, P.U.

Current Data Parameters  
NAME Dec13-2022  
EXPNO 420  
PROCNO 1

F2 - Acquisition Parameters  
Date\_ 20221213  
Time 16.31 h  
INSTRUM Avance Neo 500  
PROBHD Z119470\_0333 (  
PULPROG zg30  
TD 65536  
SOLVENT DMSO  
NS 16  
DS 0  
SWH 14705.883 Hz  
FIDRES 0.448788 Hz  
AQ 2.2282240 sec  
RG 95.7854  
DW 34.000 usec  
DE 6.79 usec  
TE 300.2 K  
D1 1.00000000 sec  
TD0 1  
SFO1 500.1730885 MHz  
NUC1 1H  
P0 3.33 usec  
P1 10.00 usec  
PLW1 20.93000031 W

F2 - Processing parameters  
SI 65536  
SF 500.1700000 MHz  
WDW EM  
SSB 0  
LB 0.30 Hz  
GB 0  
PC 1.00

## 2.3 <sup>13</sup>C NMR OF IHC-2

IHC-2

C13CPD DMSO {D:\Spectra} nmr 42

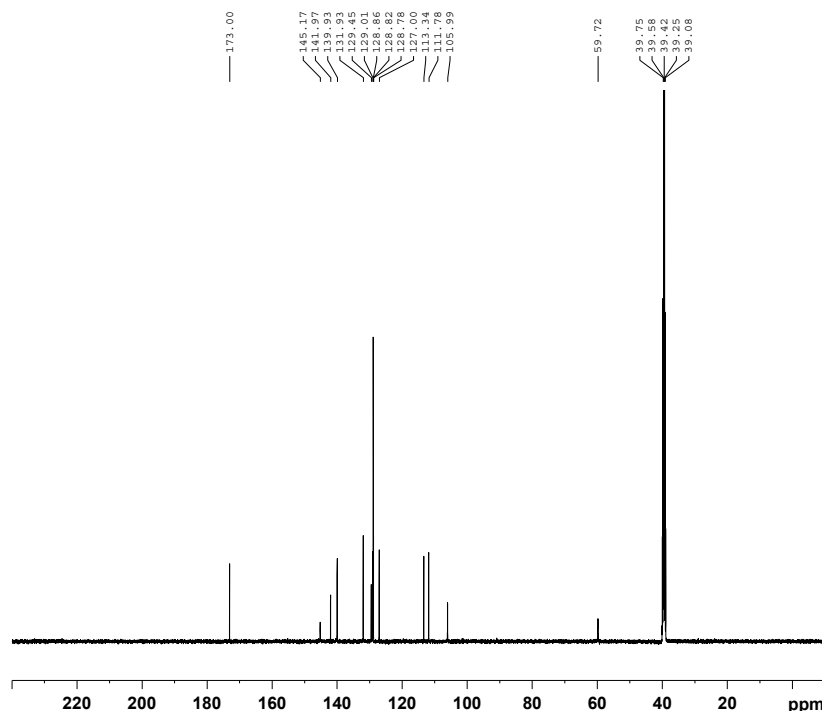

BRUKER  
AVANCE NEO  
500 MHz NMR SPECTROMETER  
SAIF, PANJAB UNIVERSITY,  
CHANDIGARH

Current Data Parameters  
NAME Dec13-2022  
EXPNO 421  
PROCNO 1

F2 - Acquisition Parameters  
Date\_ 20221214  
Time\_ 2.20 h  
INSTRUM Avance Neo 500  
PROBHD Z119470\_0333 (   
PULPROG zgpg30  
TD 65536  
SOLVENT DMSO  
NS 512  
DS 4  
SWH 37037.035 Hz  
FIDRES 1.130281 Hz  
AQ 0.8847360 sec  
RG 101  
DW 13.500 usec  
DE 6.50 usec  
TE 300.2 K  
D1 2.00000000 sec  
D11 0.03000000 sec  
SFO1 125.7804233 MHz  
NUC1 13C  
P0 3.33 usec  
P1 10.00 usec  
PLW1 83.14099884 W  
SFO2 500.1720007 MHz  
NUC2 1H  
CPDPRG2 waltz65  
PCPD2 80.00 usec  
PLW2 20.93000031 W  
PLW12 0.32703000 W  
PLW13 0.16449000 W

F2 - Processing parameters  
S1 32768  
SF 125.7679219 MHz  
WDW EM  
SSB 0  
LB 1.00 Hz  
GB 0  
PC 1.40

## 2.4.MASS SPECTRUM OF IHC-2

IHC2

Scan: 504 TIC=8003024 Base=761FS #Ions=512 RT=13.62

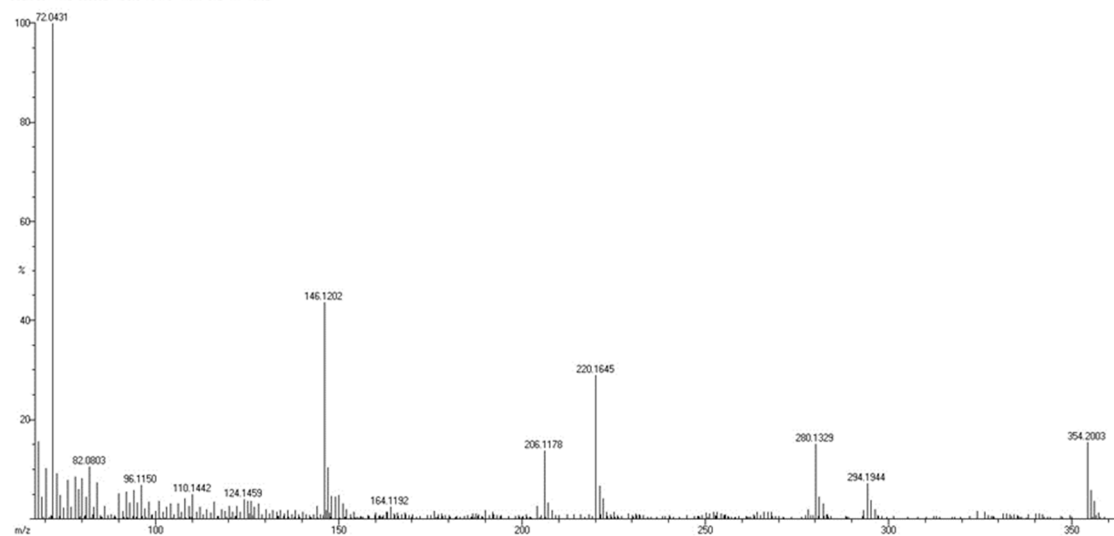

## 2.5. SPECTRAL INTERPRETATION

**(3Z)-5-bromo-3-((3-phenylallylidene)hydrazineylidene)indolin-2-one(IHC-2):** <sup>1</sup>H NMR (500 MHz, DMSO) δ 10.79 (s, 1H,NH), 7.62-7.24 (m, 8H,Ar-H),6.84 (d,1H,=CH-), 6.48 (d,1H,-CH-), 6.02 (s, 1H,-CH-).<sup>13</sup>C NMR(500 MHz, DMSO)δ: 173, 145.17, 1471.97, 139.93, 131.93, 129.45, 129.01, 128.86, 128.82, 128.78, 127, 113.34, 111.78, 105.99, 59.72.Molecular Formula: C<sub>17</sub>H<sub>12</sub>BrN<sub>3</sub>O,(HRMS)Calculated Mol.wt.= 354.21, Observed Mol.wt. = 354.2003.

**Figure S3. IHC-3 Structure**

### 3. IHC-3

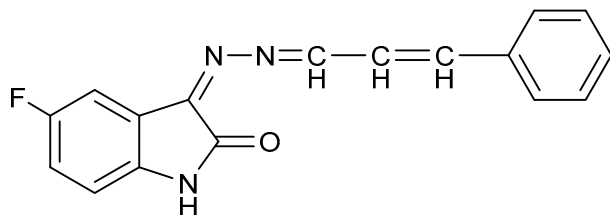

#### 3.1 TLC OF IHC-3

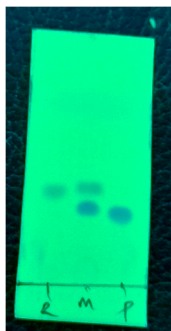

R = Reactant, M = Mixture, P = Product

#### 3.2. $^1\text{H}$ NMR OF IHC-3

IHC-3

1H\_8scan DMSO {D:\Spectra} nmr 43

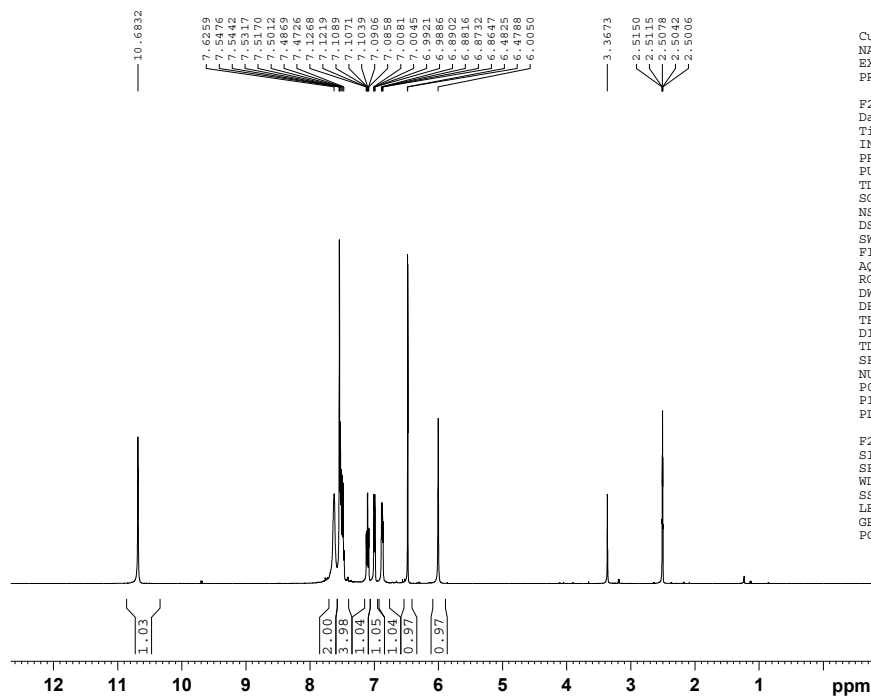

```

BRUKER
AVANCE NEO
500 MHz NMR
SPECTROMETER
SAIF, P.U.

Current Data Parameters
NAME      Dec13-2022
EXPNO     430
PROCNO    1

F2 - Acquisition Parameters
Date_     20221213
Time      16.33 h
INSTRUM   Avance Neo 500
PROBHD    Z119470_0333 (
PULPROG   zg30
TD         65536
SOLVENT   DMSO
NS         16
DS         0
SWH        14705.883 Hz
FIDRES     0.448788 Hz
AQ         2.2282240 sec
RG         95.7854
DW         34.000 usec
DE         6.79 usec
TE         300.2 K
D1         1.00000000 sec
TD0        1
SF01       500.1730885 MHz
NUC1       1H
P0         3.33 usec
P1         10.00 usec
PLW1       20.93000031 W

F2 - Processing parameters
SI         65536
SF         500.1700000 MHz
WDW        EM
SSB        0
LB         0.30 Hz
GB         0
PC         1.00
    
```

### 3.3. <sup>13</sup>C NMR OF IHC-3

IHC-3

C13CPD DMSO {D:\Spectra} nmr 43

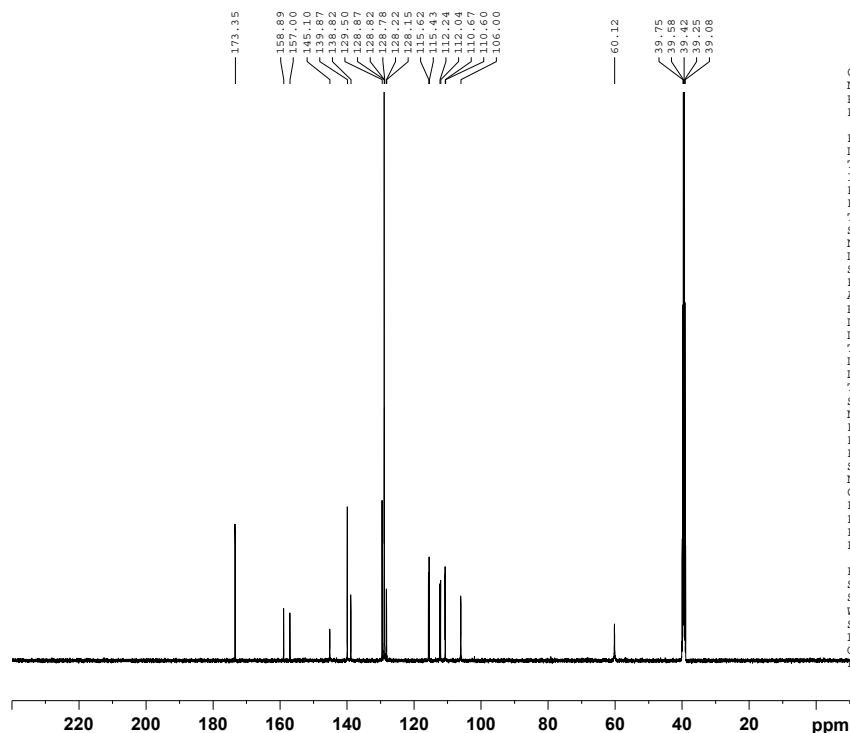

BRUKER  
AVANCE NEO  
500 MHz NMR SPECTROMETER  
SAIF, PANJAB UNIVERSITY,  
CHANDIGARH

Current Data Parameters  
NAME Dec13-2022  
EXPNO 431  
PROCNO 1

F2 - Acquisition Parameters  
Date\_ 20221214  
Time\_ 2.47 h  
INSTRUM Avance Neo 500  
PROBHD Z119470\_0333 (  
PULPROG zgpg30  
TD 65536  
SOLVENT DMSO  
NS 512  
DS 4  
SWH 37037.035 Hz  
FIDRES 1.130281 Hz  
AQ 0.8847360 sec  
RG 101  
DW 13.500 usec  
DE 6.50 usec  
TE 300.1 K  
D1 2.00000000 sec  
D11 0.03000000 sec  
TD0 1  
SFO1 125.7804233 MHz  
NUC1 13C  
P0 3.33 usec  
P1 10.00 usec  
PLW1 83.14099884 W  
SFO2 500.1720007 MHz  
NUC2 1H  
CPDPRG2 waltz265  
PCPD2 80.00 usec  
PLW2 20.93000031 W  
PLW12 0.32703000 W  
PLW13 0.16449000 W

F2 - Processing parameters  
SI 32768  
SF 125.7679203 MHz  
WDW EM  
SSB 0  
LB 1.00 Hz  
GB 0  
PC 1.40

### 3.4. MASS SPECTRUM OF IHC-3

IHC3

Scan: 549 TIC=7095840 Base=56.1%FS #Ions=516 RT=14.73

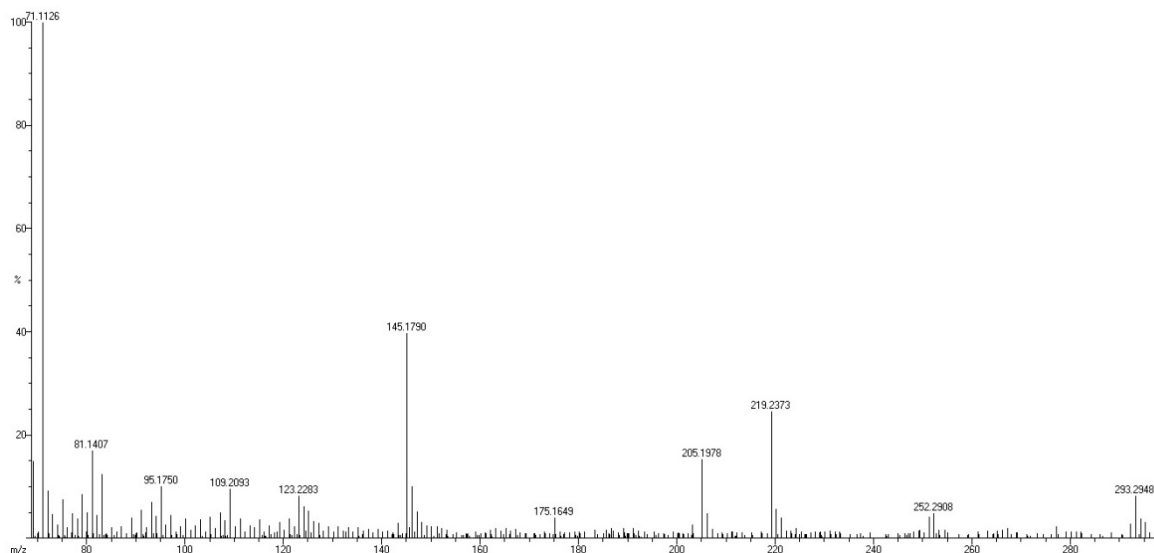

### 3.5. SPECTRAL INTERPRETATION

**(3Z)-5-fluoro-3-((3-phenylallylidene)hydrazineylidene)indolin-2-one(IHC-3):** <sup>1</sup>H NMR (500 MHz, DMSO) δ 10.68 (s, 1H, NH), 7.63-6.87(m, 9H, Ar-H, =CH), 6.48 (d, 1H, -CH-), 6.00 (s, 1H, -CH-). <sup>13</sup>C NMR (500 MHz, DMSO) δ: 173.35, 158.89, 157, 145.10, 139.87, 138.82, 129.50, 128.87, 128.82, 128.78, 128.15, 115.62, 115.24, 112.24, 110.67, 106, 60.12. Molecular formula: C<sub>17</sub>H<sub>12</sub>FN<sub>3</sub>O, (HRMS), Calculated Mol.wt. 293.30, Observed Mol.wt. 293.2948.

**Figure S4. IHC-4 Structure**

#### 4. IHC-4

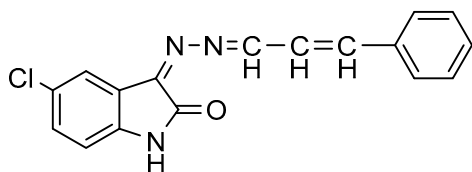

##### 4.1 TLC OF IHC-4

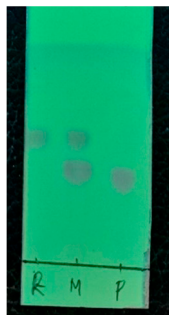

R = Reactant, M= Mixture, P = Product

##### 4.2. <sup>1</sup>H NMR OF IHC-4

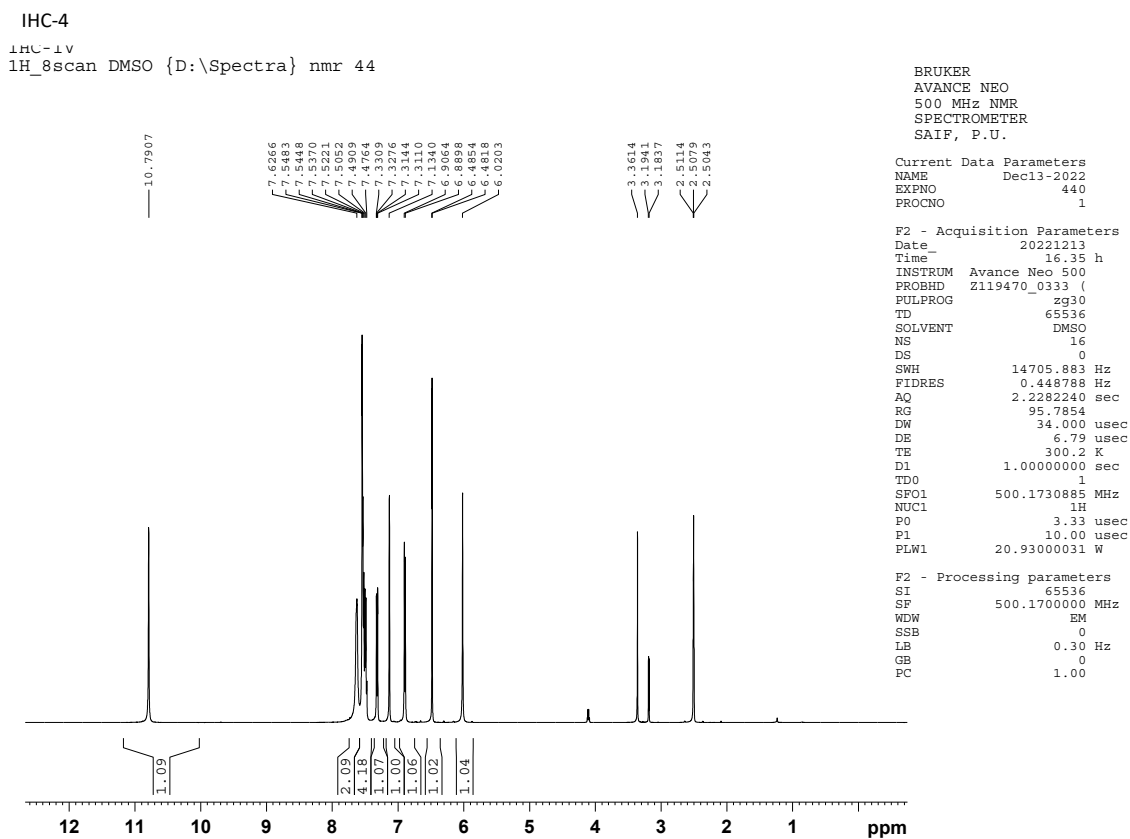

#### 4.3. $^{13}\text{C}$ NMR OF IHC-4

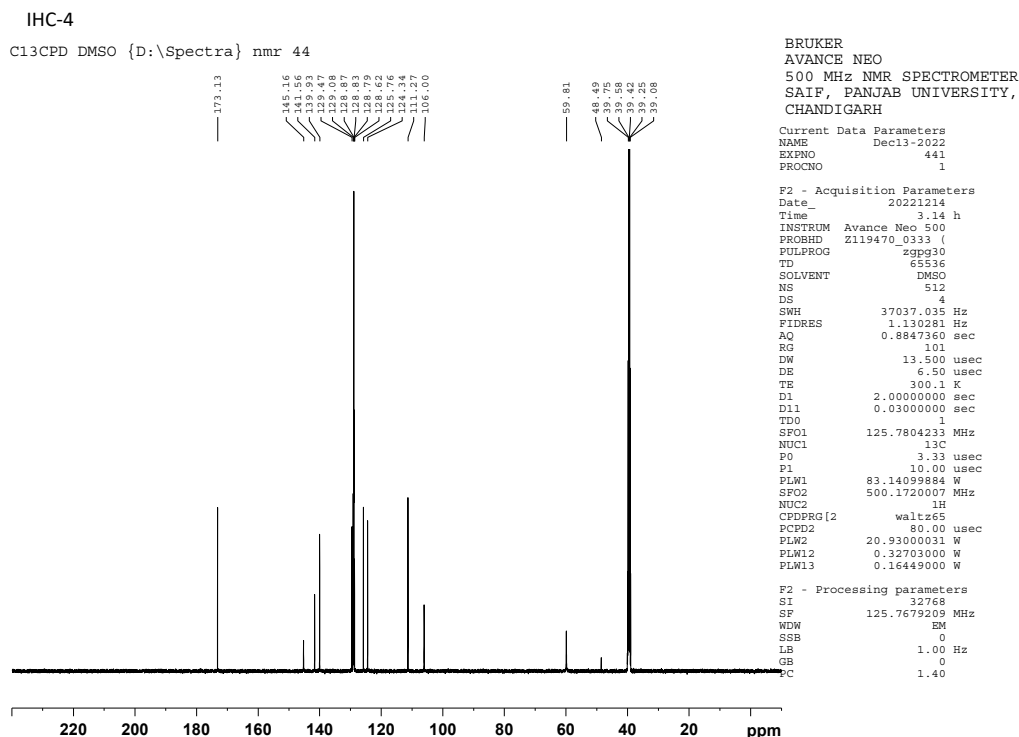

#### 4.4.MASS SPECTRUM OF IHC-4

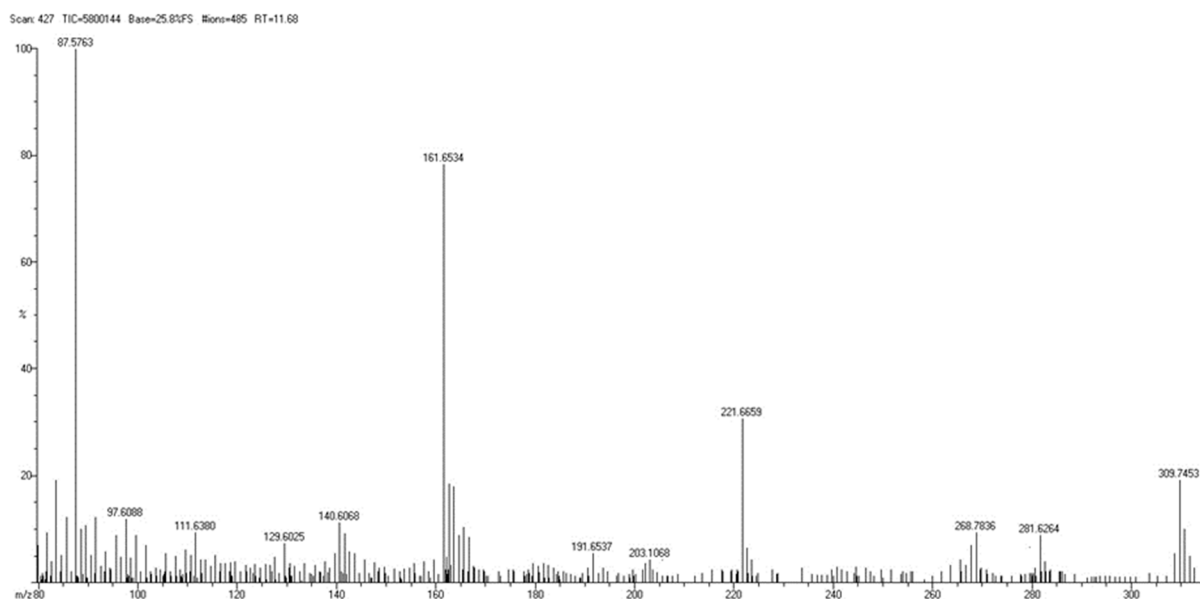

#### 4.5. SPECTRUM INTERPRETATION

**(3Z)-5-chloro-3-((3-phenylallylidene)hydrazineylidene)indolin-2-one(IHC-4):**  $^1\text{H}$  NMR (500 MHz, DMSO)  $\delta$  10.79 (s, 1H, NH), 7.63-7.13 (m, 8H, Ar-H), 6.90 (d, 1H=CH-), 6.48 (d, 1H, -CH-), 6.02 (s, 1H, -CH-).  $^{13}\text{C}$  NMR (500 MHz, DMSO)  $\delta$ : 173.13, 145.16, 141.56, 139.93, 129.47, 129.08, 128.87, 128.83, 128.79, 128.62, 125.76, 124.34, 111.27, 106, 59.81, 48.49. Molecular formula:  $\text{C}_{17}\text{H}_{12}\text{ClN}_3\text{O}$ , (HRMS) Calculated Mol.wt. = 309.75, Observed Mol.wt. = 309.7453.

**Figure S5. IHC-5 Structure**

## 5. IHC-5

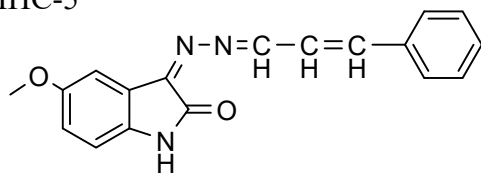

## 5.1 TLC OF IHC-5

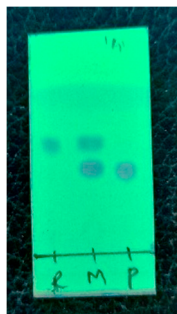

R = Reactant, M= Mixture, P = Product

## 5.2. <sup>1</sup>H NMR OF IHC-5

IHC-V  
1H 8scan DMSO {D:\Spectra} nmr 45  
IHC-5

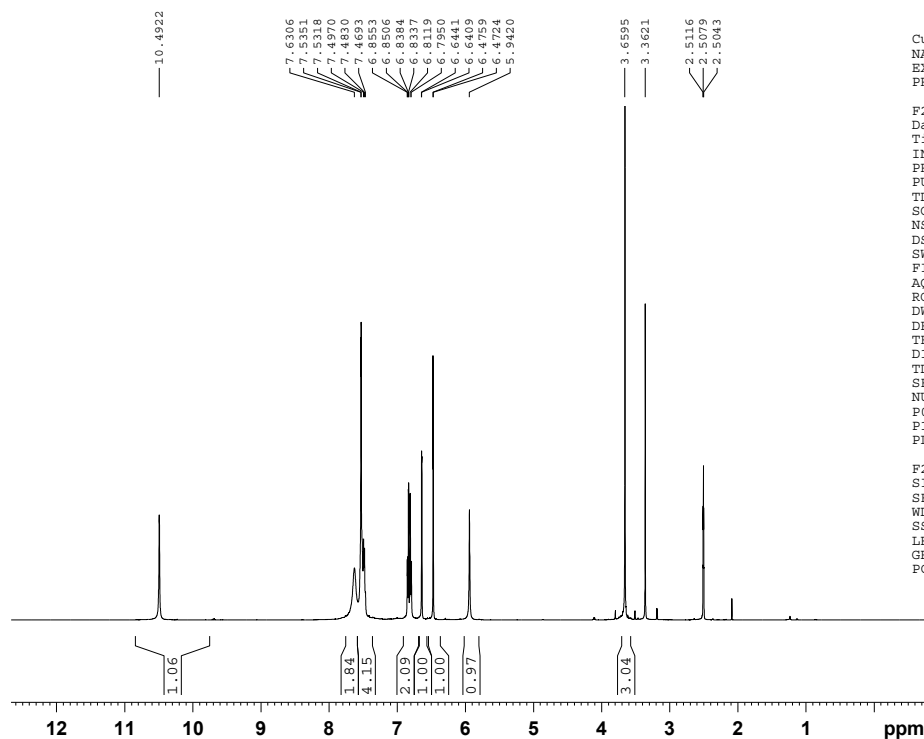

```

BRUKER
AVANCE NEO
500 MHz NMR
SPECTROMETER
SAIF, P.U.

Current Data Parameters
NAME      Dec13-2022
EXPNO     450
PROCNO    1

F2 - Acquisition Parameters
Date_     20221213
Time      16.38 h
INSTRUM   Avance Neo 500
PROBHD    Z119470_0333 (
PULPROG   zg30
TD         65536
SOLVENT    DMSO
NS         16
DS         0
SWH        14705.883 Hz
FIDRES     0.448788 Hz
AQ         2.2282240 sec
RG         69.4469
DW         34.000 usec
DE         6.79 usec
TE         300.2 K
D1         1.00000000 sec
TD0        1
SF01       500.1730885 MHz
NUC1       1H
P0         3.33 usec
P1         10.00 usec
PLW1       20.93000031 W

F2 - Processing parameters
SI         65536
SF         500.1700000 MHz
WDW        EM
SSB        0
LB         0.30 Hz
GB         0
PC         1.00
    
```

### 5.3. <sup>13</sup>C NMR OF IHC-5

IHC-5

C13CPD DMSO {D:\Spectra} nmr 45

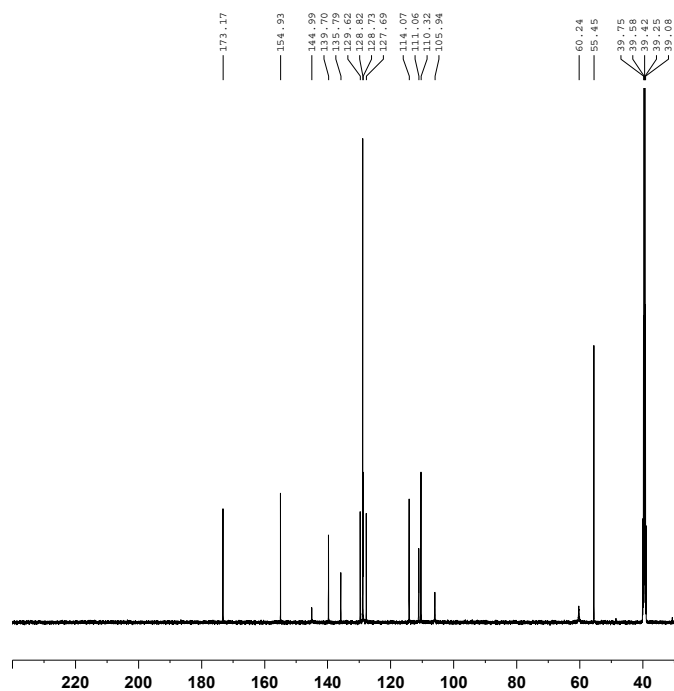

BRUKER  
AVANCE NEO  
500 MHz NMR SPECTROMETER  
SAIF, PANJAB UNIVERSITY,  
CHANDIGARH

Current Data Parameters  
NAME Dec13-2022  
EXPNO 451  
PROCNO 1

F2 - Acquisition Parameters  
Date\_ 20221214  
Time 3.40 h  
INSTRUM Avance Neo 500  
PROBHD Z119470\_0333 (  
PULPROG zgpg30  
TD 65536  
SOLVENT DMSO  
NS 512  
DS 4  
SWH 37037.035 Hz  
FIDRES 1.130281 Hz  
AQ 0.8847360 sec  
RG 101  
DW 13.500 usec  
DE 6.50 usec  
TE 300.1 K  
D1 2.00000000 sec  
D11 0.03000000 sec  
TD0 1  
SF01 125.7804233 MHz  
NUC1 13C  
P0 3.33 usec  
P1 10.00 usec  
PLW1 83.14099884 W  
SF02 500.1720007 MHz  
NUC2 1H  
CPDPRG[2] waltz65  
PCPD2 80.00 usec  
PLW2 20.93000031 W  
PLW12 0.32703000 W  
PLW13 0.16449000 W

F2 - Processing parameters  
SI 32768  
SF 125.7679200 MHz  
WDW EM  
SSB 0  
LB 1.00 Hz  
GB 0  
PC 1.40

### 5.4.MASS SPECTRUM OF IHC-5

IHC5

Scan: 504 TIC=8003024 Base=76%FS #Ions=512 RT=13.62

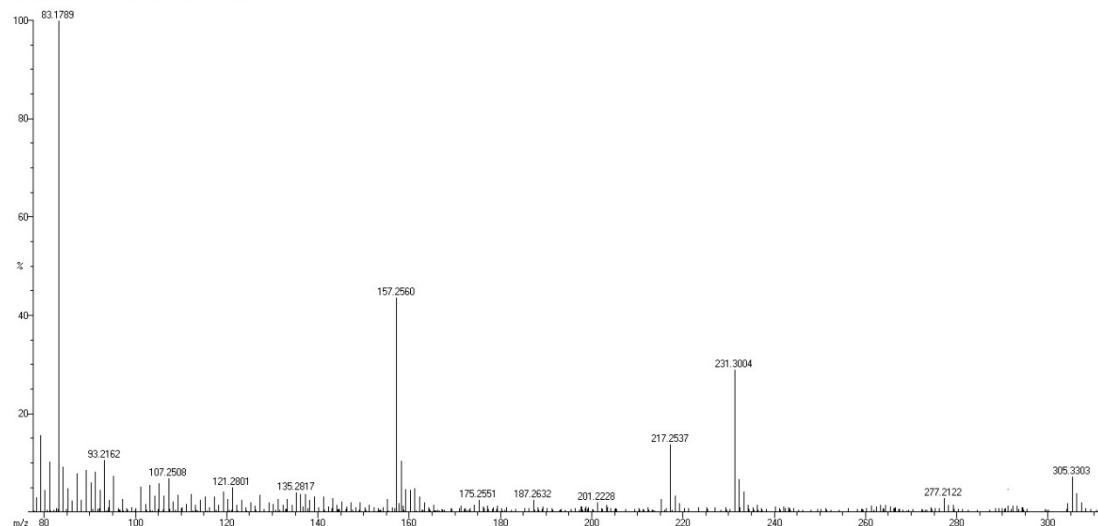

### 5.5. SPECTRUM INTERPRETATION

**(3Z)-5-methoxy-3-((3-phenylallylidene)hydrazineylidene)indolin-2-one(IHC-5)** <sup>1</sup>H NMR (500 MHz, DMSO) δ: 10.49 (s,1H,NH), 7.69-6.64(m,9H, Ar-H,=CH-) 6.47 (d,1H -CH-), 5.94 (s,1H,-CH-), 3.66 (s,3H,-OCH<sub>3</sub>-). <sup>13</sup>C NMR (500 MHz, DMSO) δ: 173.17, 154.93, 144.99, 139.70, 135.79, 129.62, 128.82, 128.73, 127.69, 114.07, 111.06, 110.32, 105.94. Molecular formula: C<sub>18</sub>H<sub>15</sub>N<sub>3</sub>O<sub>2</sub>, (HRMS) Calculated Mol.wt. = 305.34, Observed Mol.wt. = 305.3303

**Figure S6. IHC-6 Structure**

## 6. IHC-6

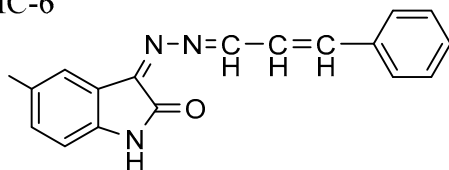

## 6.1 TLC OF IHC-6

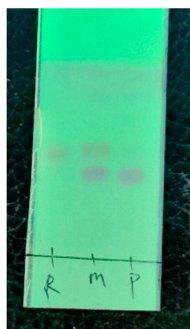

R = Reactant, M= Co-mixture, P = Product

## 6.2. <sup>1</sup>H NMR OF IHC-6

IHC-VI  
<sup>1</sup>H 800 MHz DMSO {D:\Spectra} nmr 46  
 IHC-6

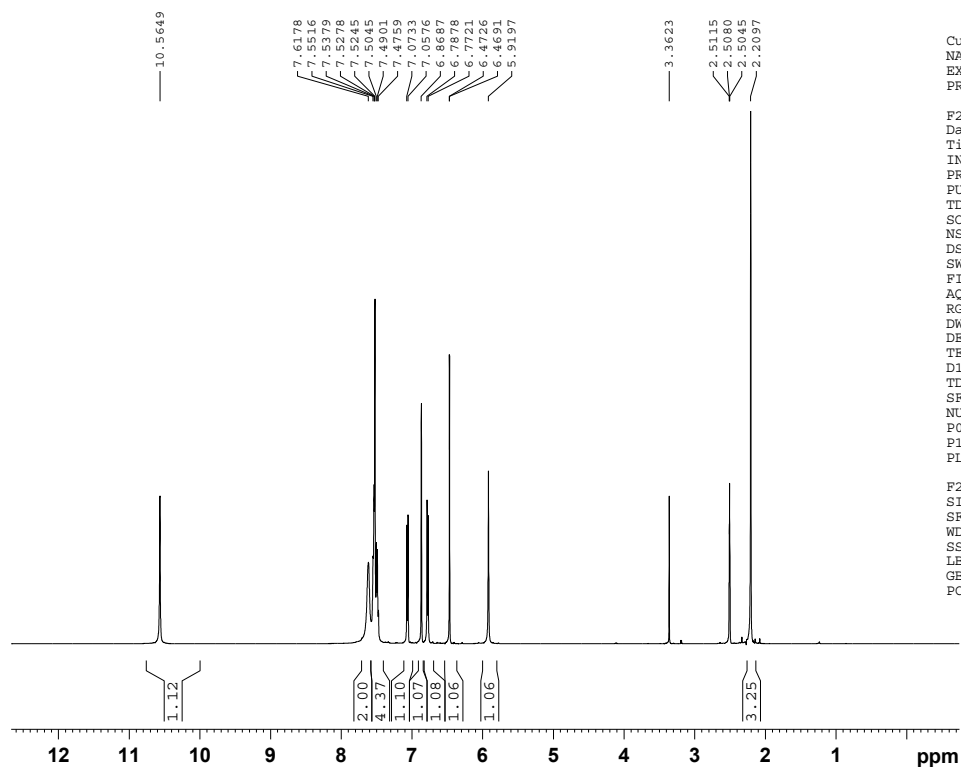

BRUKER  
 AVANCE NEO  
 500 MHz NMR  
 SPECTROMETER  
 SAIF, P.U.

Current Data Parameters  
 NAME Dec13-2022  
 EXPNO 460  
 PROCNO 1

F2 - Acquisition Parameters  
 Date\_ 20221213  
 Time\_ 16.41 h  
 INSTRUM Avance Neo 500  
 PROBHD Z119470\_0333 (  
 PULPROG zg30  
 TD 65536  
 SOLVENT DMSO  
 NS 16  
 DS 0  
 SWH 14705.883 Hz  
 FIDRES 0.448788 Hz  
 AQ 2.2282240 sec  
 RG 74.7739  
 DW 34.000 usec  
 DE 6.79 usec  
 TE 300.2 K  
 D1 1.00000000 sec  
 TD0 1  
 SFO1 500.1730885 MHz  
 NUC1 1H  
 P0 3.33 usec  
 P1 10.00 usec  
 PLW1 20.93000031 W

F2 - Processing parameters  
 SI 65536  
 SF 500.1700000 MHz  
 WDW EM  
 SSB 0  
 LB 0.30 Hz  
 GB 0  
 PC 1.00

### 6.3. $^{13}\text{C}$ NMR OF IHC-6

IHC-6

C13CPD DMSO {D:\Spectra} nmr 46

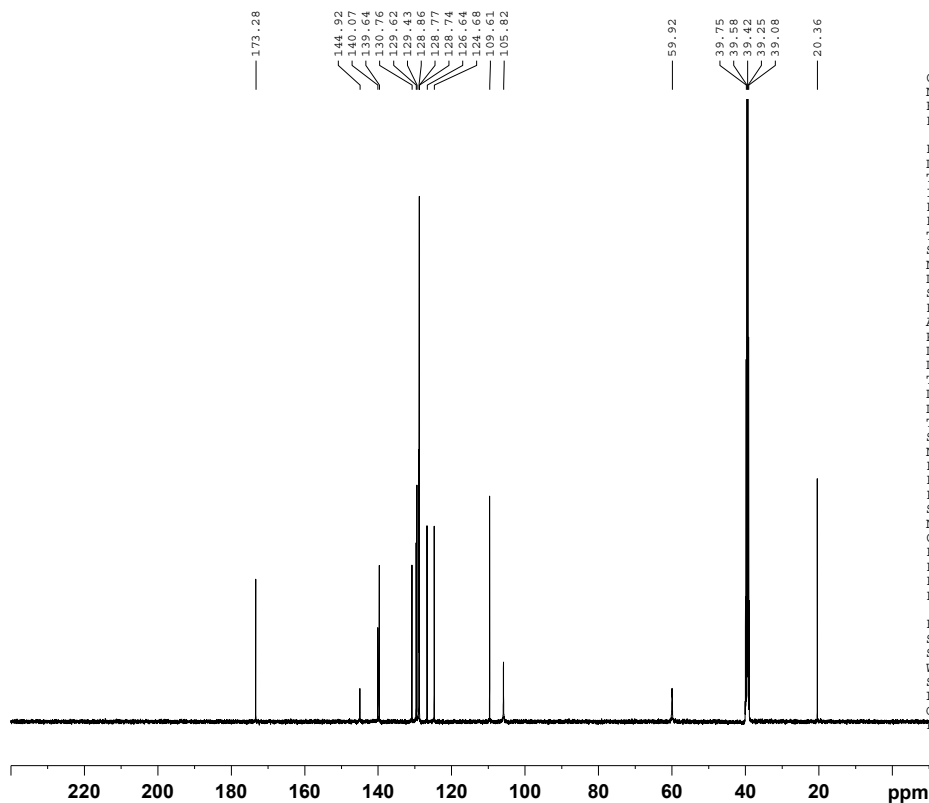

BRUKER  
AVANCE NEO  
500 MHz NMR SPECTROMETER  
SAIF, PANJAB UNIVERSITY,  
CHANDIGARH

Current Data Parameters  
NAME Dec13-2022  
EXPNO 461  
PROCNO 1

F2 - Acquisition Parameters  
Date\_ 20221214  
Time 4.07 h  
INSTRUM Avance Neo 500  
PROBHD Z119470\_0333 (  
PULPROG zgpg30  
TD 65536  
SOLVENT DMSO  
NS 512  
DS 4  
SWH 37037.035 Hz  
FIDRES 1.130281 Hz  
AQ 0.8847360 sec  
RG 101  
DW 13.500 usec  
DE 6.50 usec  
TE 300.1 K  
D1 2.0000000 sec  
D11 0.0300000 sec  
TD0 1  
SFO1 125.7804233 MHz  
NUC1 13C  
P0 3.33 usec  
P1 10.00 usec  
PLW1 83.14099884 W  
SFO2 500.1720007 MHz  
NUC2 1H  
CPDPRG2 waltz65  
PCPD2 80.00 usec  
PLW2 20.93000031 W  
PLW12 0.32703000 W  
PLW13 0.16449000 W

F2 - Processing parameters  
SI 32768  
SF 125.7679212 MHz  
WDW EM  
SSB 0  
LB 1.00 Hz  
GB 0  
PC 1.40

### 6.4. MASS SPECTRUM OF IHC-6

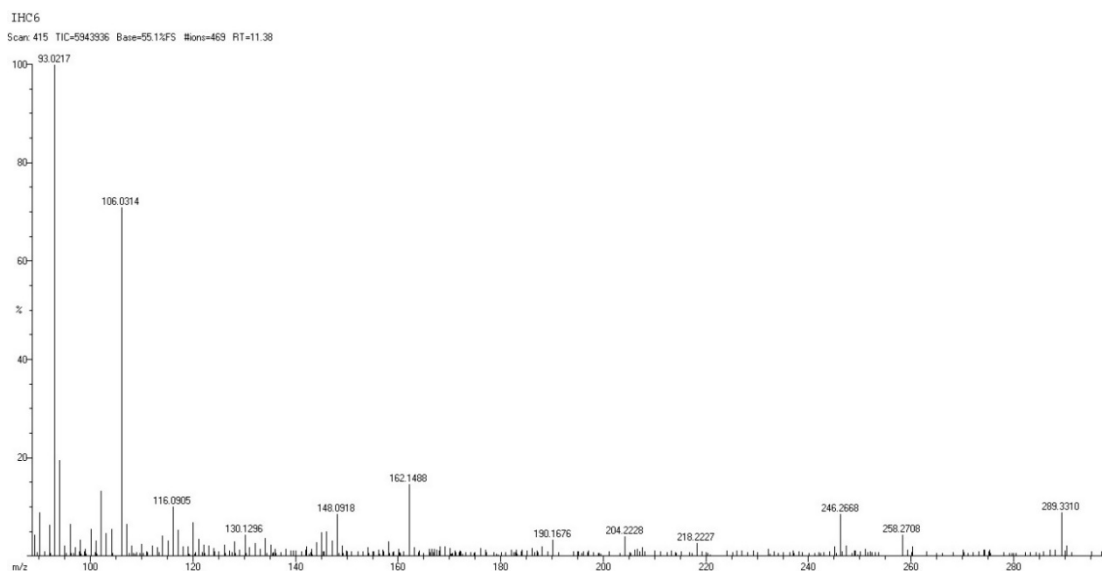

### 6.5. SPECTRUM INTERPRETATION

**(3Z)-5-methyl-3-((3-phenylallylidene)hydrazineylidene)indolin-2-one(IHC-6)**  $^1\text{H}$  NMR (500 MHz, DMSO)  $\delta$ : 10.56 (s, 1H, NH), 7.62-6.87 (m, 8H, Ar-H), 6.78 (d, 1H, =CH-), 6.47 (d, 1H, -CH-), 5.92 (s, 1H-CH-), 2.21 (s, 3H, -CH<sub>3</sub>).  $^{13}\text{C}$  NMR (500 MHz, DMSO)  $\delta$ : 173.28, 144.92, 140.07, 139.64, 130.76, 129.62, 129.43, 128.77, 128.74, 126.64, 124.68, 109.61, 105.82, 59.92, 20.36. Molecular formula: C<sub>18</sub>H<sub>15</sub>N<sub>3</sub>O, (HRMS) Calculated Mol.wt. = 289.34, Observed Mol.wt. = 289.3310.

**Figure S7. IHMC-1 Structure**

## 7. IHMC-1

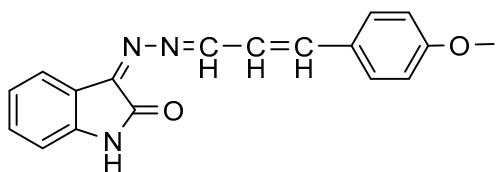

### 7.1 TLC OF IHMC-1

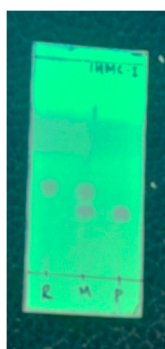

R = Reactant, M= Mixture, P = Product

### 7.2. <sup>1</sup>H NMR OF IHMC-1

IHMC-I  
<sup>1</sup>H NMR (DMSO-d<sub>6</sub>) {D:\Spectra} nmr 47  
 IHMC-1

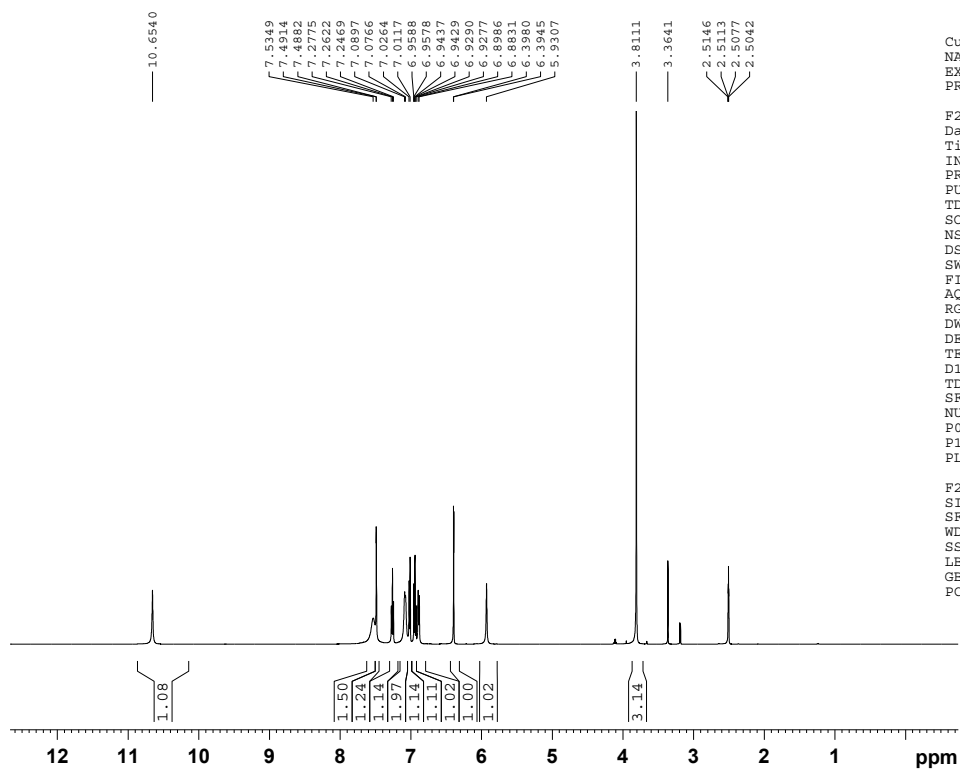

```

BRUKER
AVANCE NEO
500 MHz NMR
SPECTROMETER
SAIF, P.U.

Current Data Parameters
NAME      Dec13-2022
EXPNO     470
PROCNO    1

F2 - Acquisition Parameters
Date_     20221213
Time      16.44 h
INSTRUM   Avance Neo 500
PROBHD    Z119470_0333 (
PULPROG   zg30
TD         65536
SOLVENT   DMSO
NS         16
DS         0
SWH        14705.883 Hz
FIDRES     0.448788 Hz
AQ         2.2282240 sec
RG         70.6628
DW         34.000 usec
DE         6.79 usec
TE         300.2 K
D1         1.00000000 sec
TD0        1
SFO1       500.1730885 MHz
NUC1       1H
P0         3.33 usec
P1         10.00 usec
PLW1       20.93000031 W

F2 - Processing parameters
SI         65536
SF         500.1700000 MHz
WDW        EM
SSB        0
LB         0.30 Hz
GB         0
PC         1.00
  
```

### 7.3. $^{13}\text{C}$ NMR OF IHMC-1

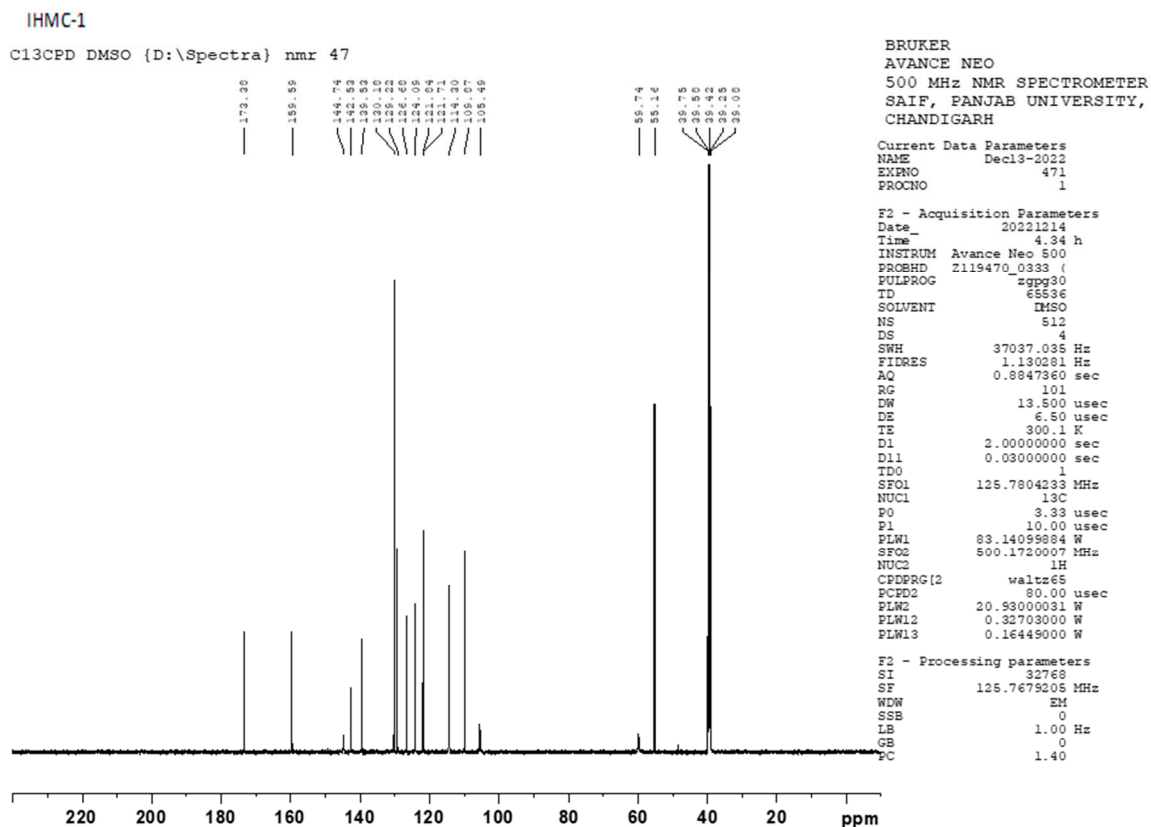

### 7.4. MASS SPECTRUM OF IHMC-1

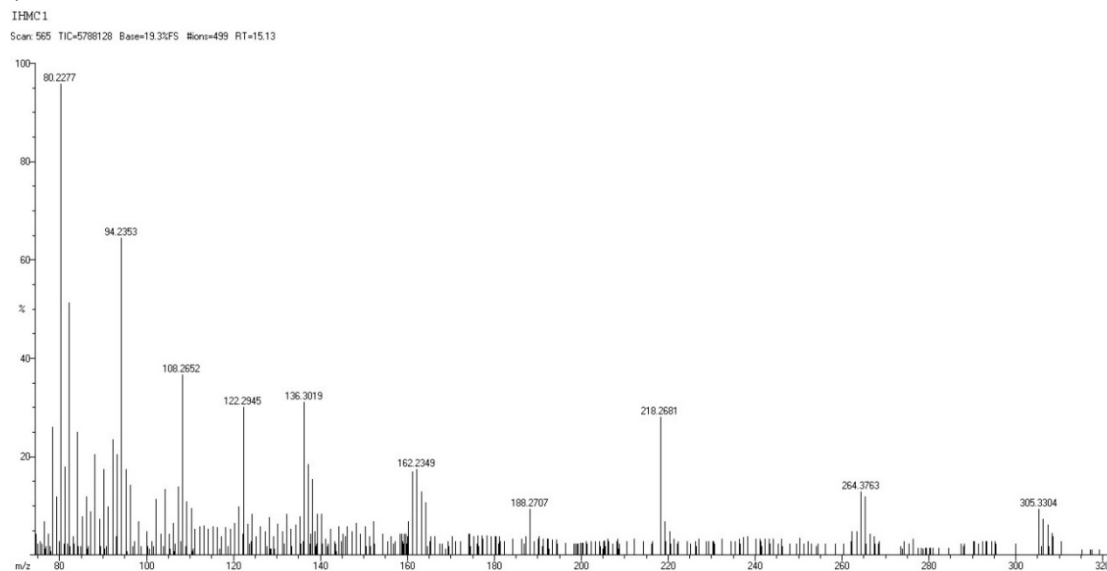

### 7.5. SPECTRUM INTERPRETATION

**(3Z)-3-((3-(4-methoxyphenyl)allylidene)hydrazineylidene)indolin-2-one(IHMC-1)**  $^1\text{H}$  NMR (500 MHz, DMSO)  $\delta$  10.65 (s, 1H, NH), 7.53-6.94(m, 8H, Ar-H), 6.89 (d, 1H, =CH-), 6.40 (d, 1H, -CH-), 5.93 (s, 1H, -CH-), 3.81 (s, 3H, -OCH<sub>3</sub>).  $^{13}\text{C}$  NMR (500 MHz, DMSO)  $\delta$  173.38, 159.59, 144.74, 142.53, 139.53, 130.18, 129.22, 126.68, 124.09, 121.84, 121.71, 114.30, 109.87, 105.49, 59.74, 55.16. Molecular formula: C<sub>18</sub>H<sub>15</sub>N<sub>3</sub>O<sub>2</sub> (HRMS), Calculated Mol.wt. = 305.34, Observed Mol.wt. = 305.3304

**Figure S8. IHMC-2 Structure**

## 8. IHMC-2

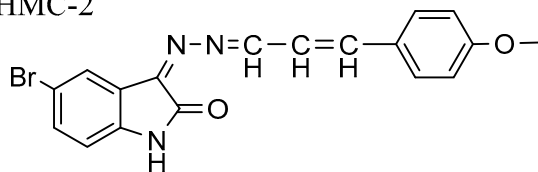

### 8.1 TLC OF IHMC-2

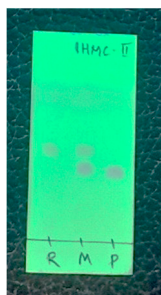

R = Reactant, M=Mixture, P = Product

### 8.2. <sup>1</sup>H NMR OF IHMC-2

IHMC-2

1H\_8scan DMSO {D:\Spectra} nmr 48

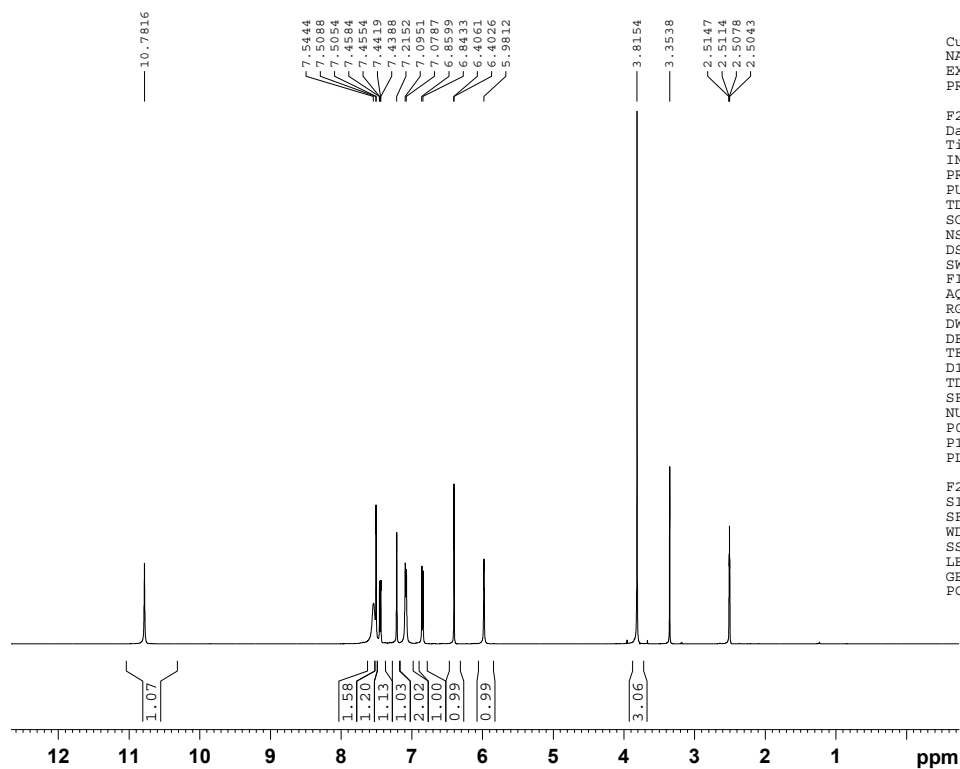

```

BRUKER
AVANCE NEO
500 MHz NMR
SPECTROMETER
SAIF, P.U.

Current Data Parameters
NAME      Dec13-2022
EXPNO     480
PROCNO    1

F2 - Acquisition Parameters
Date_     20221213
Time      16.46 h
INSTRUM   Avance Neo 500
PROBHD    Z119470_0333 (
PULPROG   zg30
TD         65536
SOLVENT    DMSO
NS         16
DS         0
SWH        14705.883 Hz
FIDRES     0.448788 Hz
AQ         2.2282240 sec
RG         95.7854
DW         34.000 usec
DE         6.79 usec
TE         300.2 K
D1         1.00000000 sec
TD0        1
SF01       500.1730885 MHz
NUC1       1H
P0         3.33 usec
P1         10.00 usec
PLW1       20.93000031 W

F2 - Processing parameters
SI         65536
SF         500.1700000 MHz
WDW        EM
SSB        0
LB         0.30 Hz
GB         0
PC         1.00
    
```

### 8.3. $^{13}\text{C}$ NMR OF IHMC-2

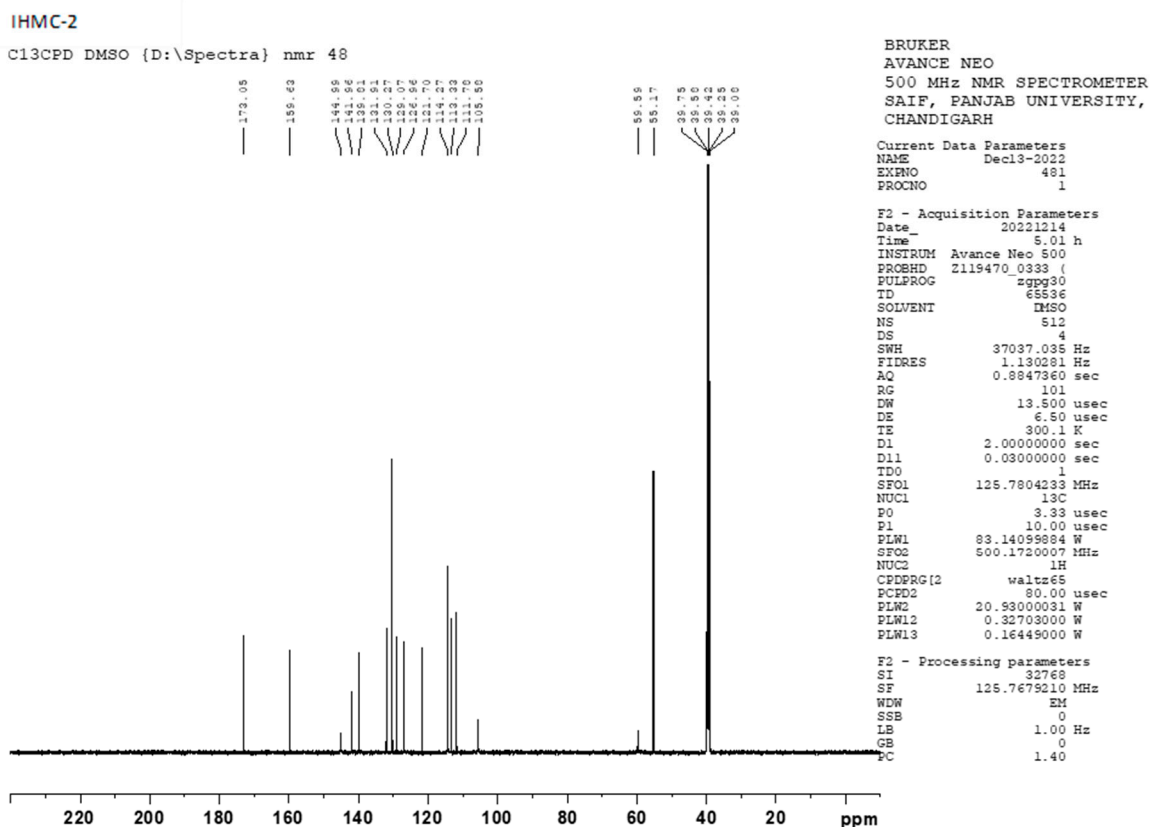

### 8.4.MASS SPECTRUM OF IHMC-2

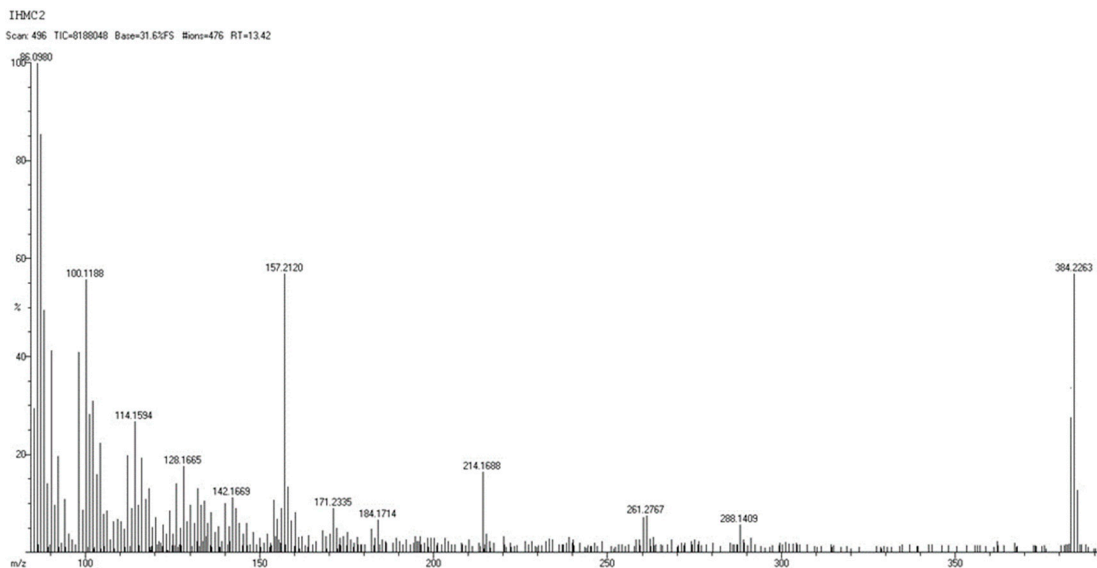

### 8.5.SPECTRUM INTERPRETATION

**(3Z)-5-bromo-3-((3-(4-methoxyphenyl)allylidene)hydrazineylidene)indolin-2-one(IHMC-2)1H**  
NMR (500 MHz, DMSO)  $\delta$  10.78 (s, 1H, NH), 7.62-7.09(m, 7H, Ar-H), 6.84 (d, 1H, =CH-), 6.40 (d, 1H, -CH-), 5.98 (s, 1H, -CH-), 3.82 (s, 3H, -OCH<sub>3</sub>).  $^{13}\text{C}$  NMR (500 MHz, DMSO)  $\delta$  173.05, 159.63, 144.99, 141.96, 139.81, 131.91, 130.27, 129.07, 126.96, 121.70, 114.27, 113.33, 111.78, 105.58, 59.59, 55.17. Molecular formula: C<sub>18</sub>H<sub>14</sub>BrN<sub>3</sub>O<sub>2</sub> (HRMS), Calculated Mol.wt.=384.23, Observed Mol.wt. = 384.2263.

**Figure S9. IHMC-3 Structure**

## 9. IHMC-3

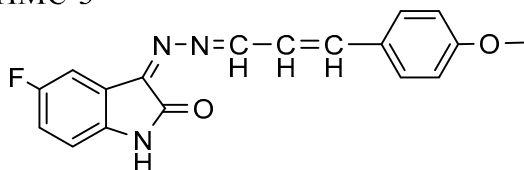

## 9.1 TLC OF IHMC-3

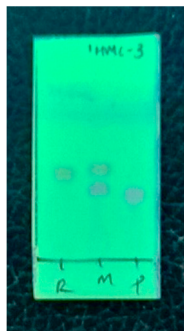

R = Reactant, M = Mixture, P = Product

## 9.2. <sup>1</sup>H NMR OF IHMC-3

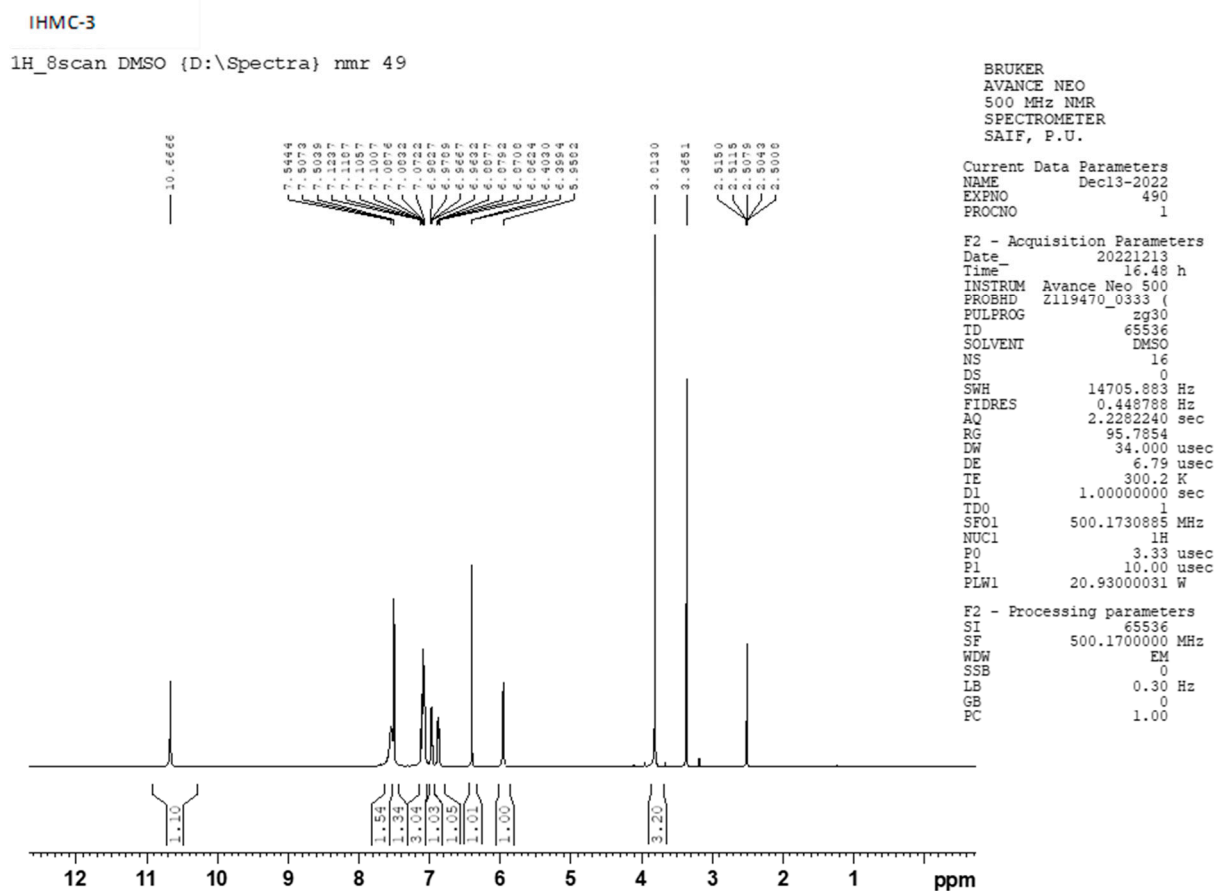

## IHC-3

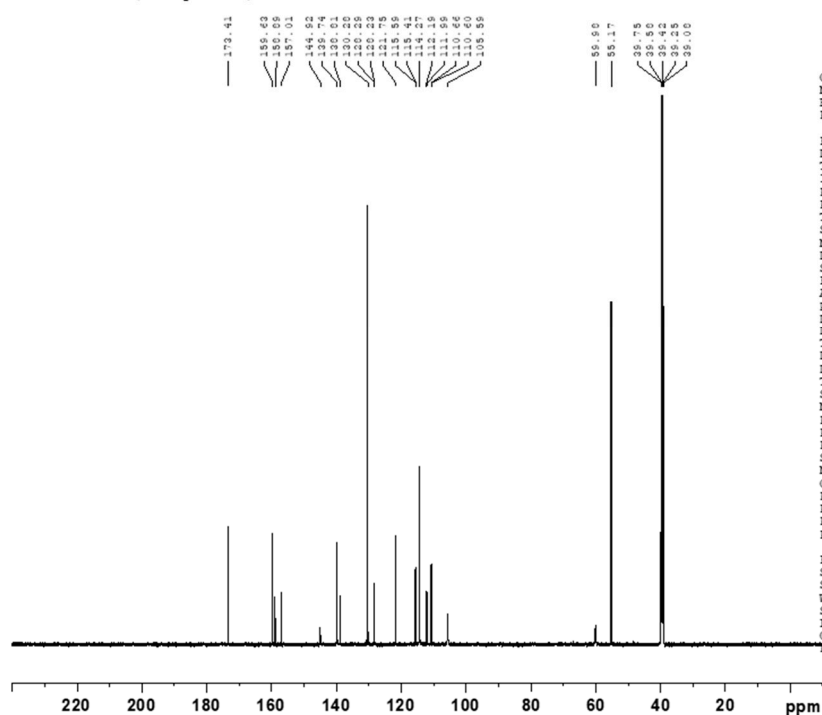

```
F2 - Processing parameters
SI                32768
SF                125.7679190 MHz
WDW               EM
SSB               0
LB                1.00 Hz
GB                0
PC                1.40
```

## IHC3

Scan: 384 TIC=4769392 Base=16.4%FS # ions=482 RT=10.6

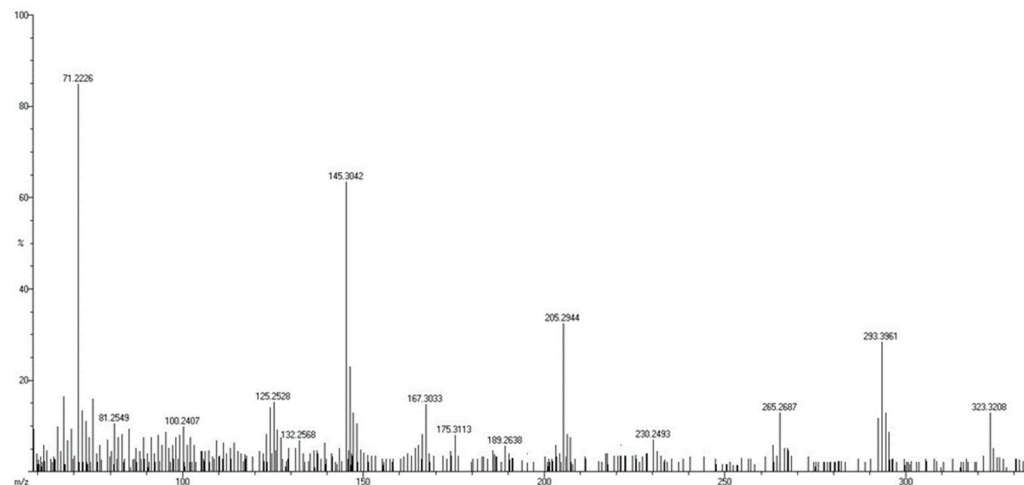

**(3Z)-5-fluoro-3-((3-(4-methoxyphenyl)allylidene)hydrazineylidene)indolin-2-one(IHMC-3)** 1H

S18

**Figure S10.** IHMC-4 Structure

### 10. IHMC-4

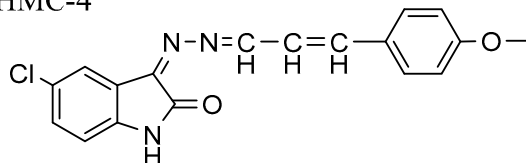

### 10.1 TLC OF IHMC-4

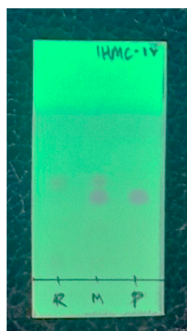

R = Reactant, M = Mixture, P = Product

### 10.2. <sup>1</sup>H NMR OF IHMC-4

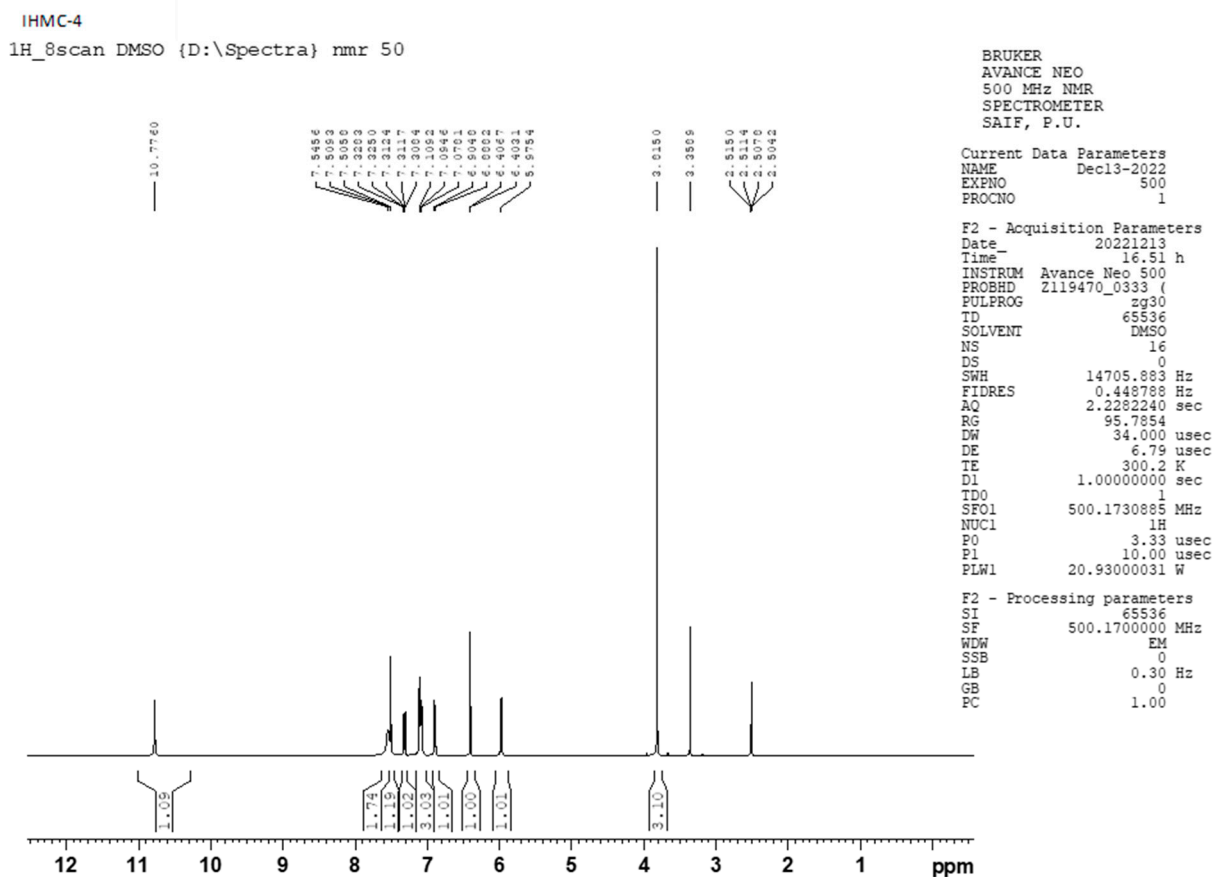

### 10.3. $^{13}\text{C}$ NMR OF IHMC-4

#### IHMC-4

C13CPD DMSO {D:\Spectra} nmr 50

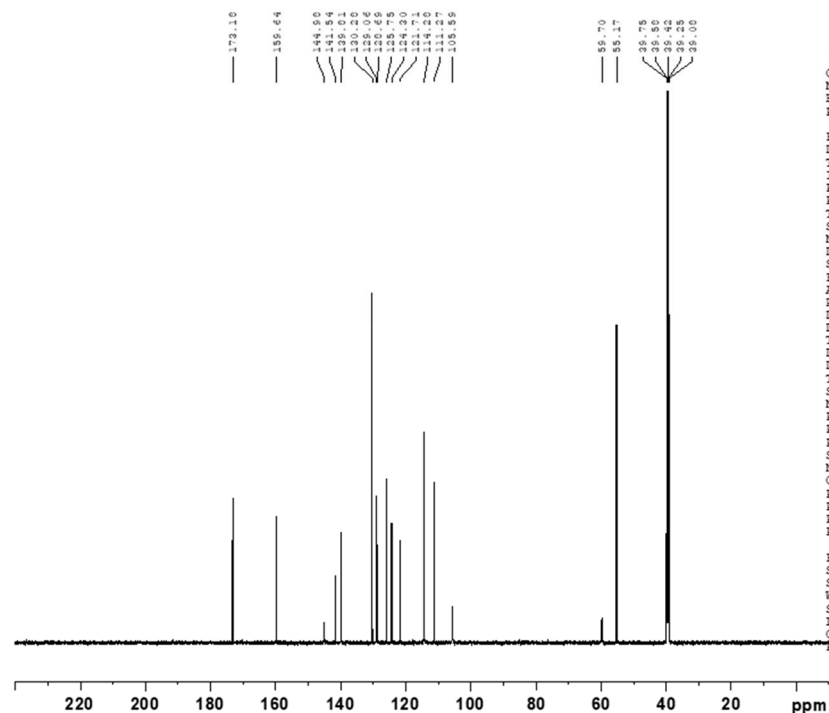

BRUKER  
AVANCE NEO  
500 MHz NMR SPECTROMETER  
SAIF, PANJAB UNIVERSITY,  
CHANDIGARH

Current Data Parameters  
NAME Dec13-2022  
EXPNO 501  
PROCNO 1

F2 - Acquisition Parameters  
Date\_ 20221214  
Time 7.20 h  
INSTRUM Avance Neo 500  
PROBHD Z119470 0933 (  
PULPROG zgpg30  
TD 65536  
SOLVENT DMSO  
NS 512  
DS 4  
SWH 37037.035 Hz  
FIDRES 1.130281 Hz  
AQ 0.8847360 sec  
RG 101  
DM 13.500 usec  
DE 6.50 usec  
TE 300.1 K  
D1 2.00000000 sec  
D11 0.03000000 sec  
TD0 1  
SFO1 125.7804233 MHz  
NUC1 13C  
P0 3.33 usec  
P1 10.00 usec  
PLW1 83.14099824 W  
SFO2 500.1720007 MHz  
NUC2 1H  
CPDPRG2 waltz66  
PCPD2 80.00 usec  
PLW2 20.93000031 W  
PLW12 0.32703000 W  
PLW13 0.16449000 W

F2 - Processing parameters  
SI 32768  
SF 125.7679201 MHz  
WDW EM  
SSB 0  
LB 1.00 Hz  
GB 0  
PC 1.40

### 10.4. MASS SPECTRUM OF IHMC-4

#### IHMC4

Scan: 427 TIC=5800144 Base=25.81%FS #Ions=485 RT=11.68

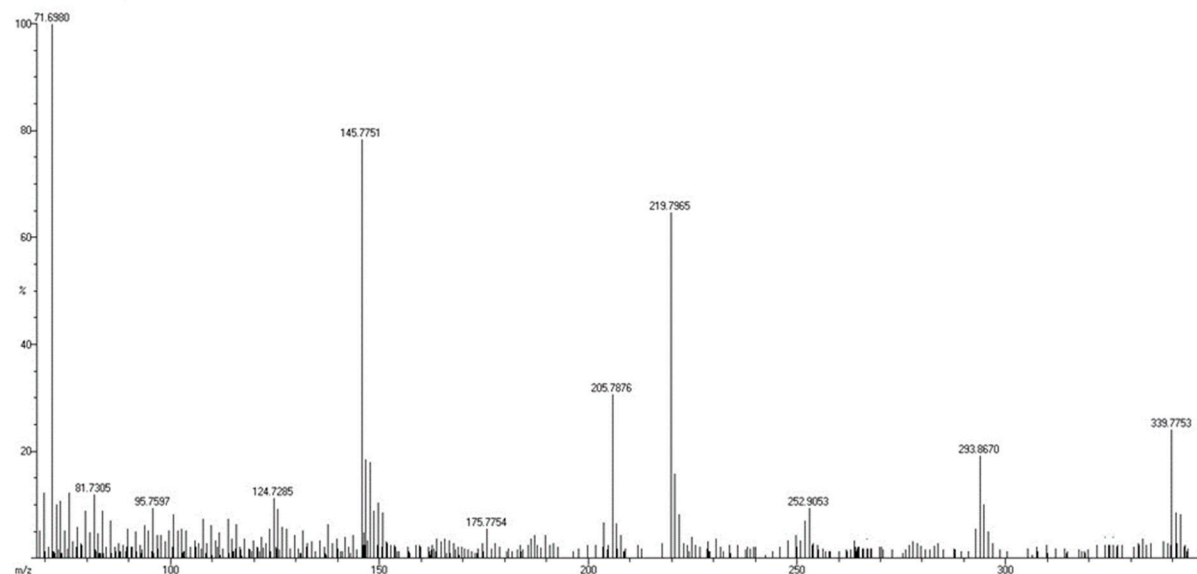

### 10.5. SPECTRUM INTERPRETATION

**(3Z)-5-chloro-3-((3-(4-methoxyphenyl)allylidene)hydrazineylidene)indolin-2-one(IHMC-4)**  $^1\text{H}$  NMR (500 MHz, DMSO)  $\delta$  10.78 (s, 1H, NH), 7.55 – 7.01 (m, 7H, Ar-H), 6.90 (d, 1H, =CH-), 6.40 (d, 1H, =CH-), 5.98 (s, 1H, -CH-), 3.81 (s, 3H, -OCH<sub>3</sub>).  $^{13}\text{C}$  NMR (500 MHz, DMSO)  $\delta$  173.18, 159.64, 141.98, 139.81, 130.28, 129.06, 128.69, 125.75, 124.30, 121.71, 114.28, 111.27, 105.59, 59.70, 55.17. Molecular formula: C<sub>18</sub>H<sub>14</sub>ClN<sub>3</sub>O<sub>2</sub> (HRMS) Calculated Mol.wt.=339.78, Observed Mol.wt.=339.7753.

**Figure S11.** IHMC-5 Structure

## 11. IHMC-5

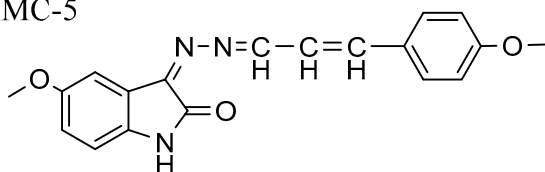

### 11.1 TLC OF IHMC-5

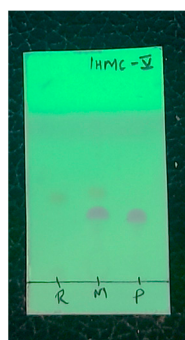

R = Reactant, M= Mixture, P = Product

### 11.2. <sup>1</sup>H NMR OF IHMC-5

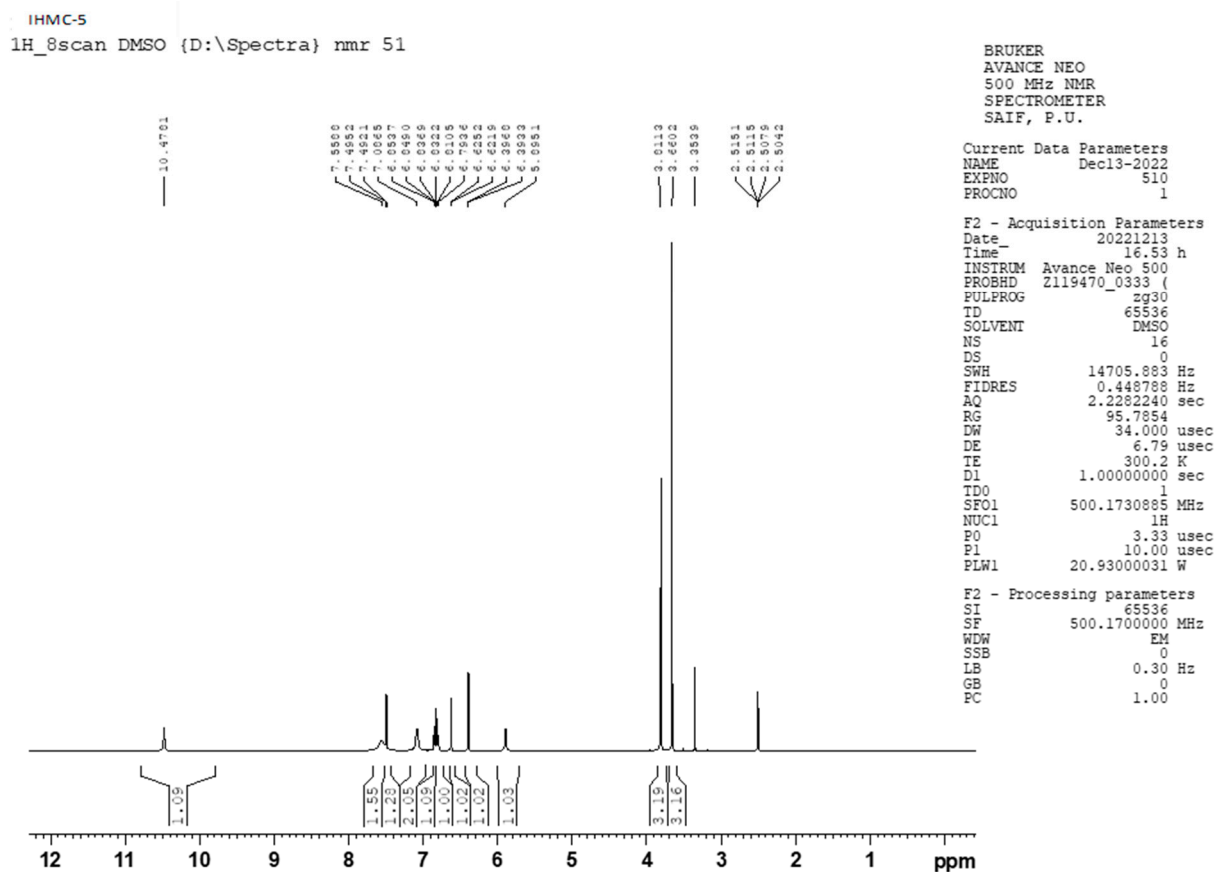

### 11.3. $^{13}\text{C}$ NMR OF IHMC-5

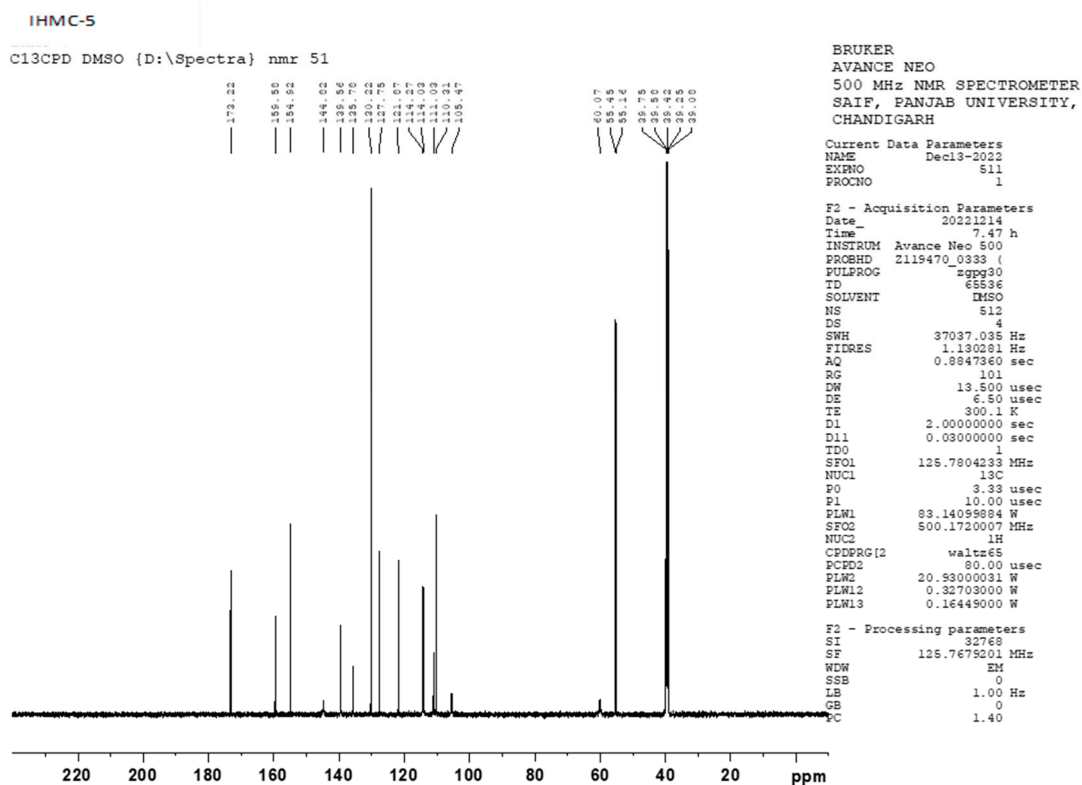

### 11.4.MASS SPECTRUM OF IHMC-5

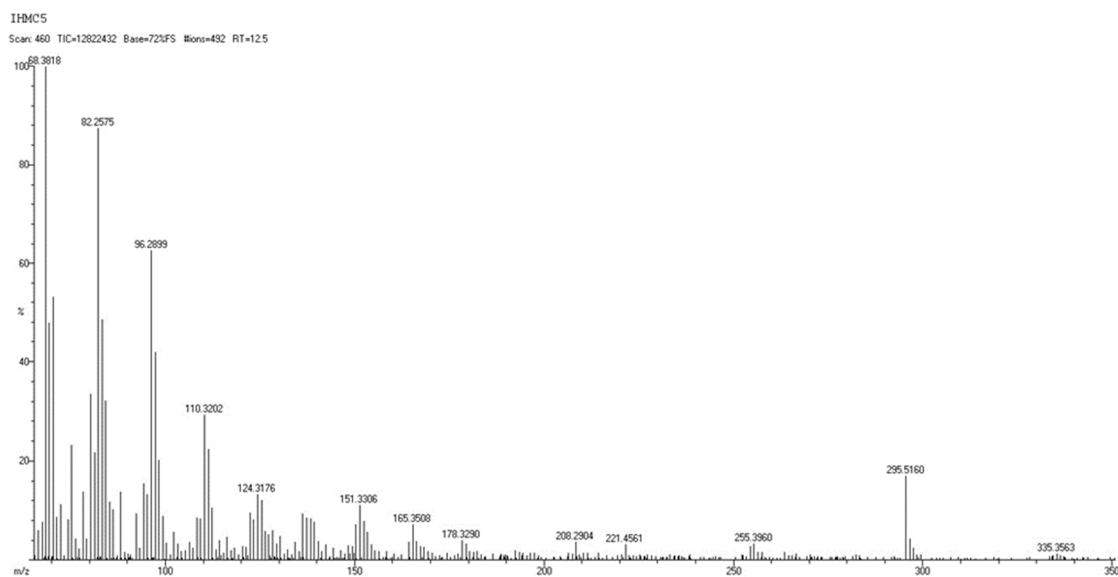

### 11.5.SPECTRUM INTERPRETATION

**(3Z)-5-methoxy-3-((3-(4-methoxyphenyl)allylidene)hydrazineylidene)indolin-2-one(IHMC-5)**  $^1\text{H}$  NMR (500 MHz, DMSO)  $\delta$  10.48 (s, 1H, NH), 7.58-6.62(m, 7H, Ar-H), 6.78 (d, 1H, =CH-), 6.40 (d, 1H, -CH-), 5.90 (s, 1H, -CH-), 3.81 (s, 3H, -OCH<sub>3</sub>), 3.66 (s, 3H, -OCH<sub>3</sub>).  $^{13}\text{C}$  NMR (500 MHz, DMSO)  $\delta$  173.22, 159.58, 154.92, 144.82, 139.56, 135.78, 130.22, 127.75, 121.87, 114.27, 114.03, 111.03, 110.31, 105.47, 60.07, 55.45, 55.16. Molecular formula: C<sub>19</sub>H<sub>17</sub>N<sub>3</sub>O<sub>3</sub> (HRMS) Calculated Mol.wt.=335.36, Observed Mol.wt.=335.3563

## 12. IHMC-6

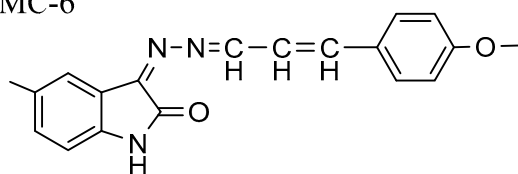

## 12.1 TLC OF IHMC-6

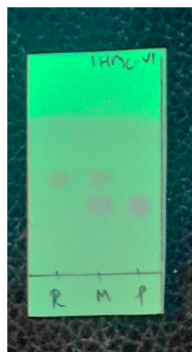

R = Reactant, M= Mixture, P = Product

## 12.2. <sup>1</sup>H NMR OF IHMC-6

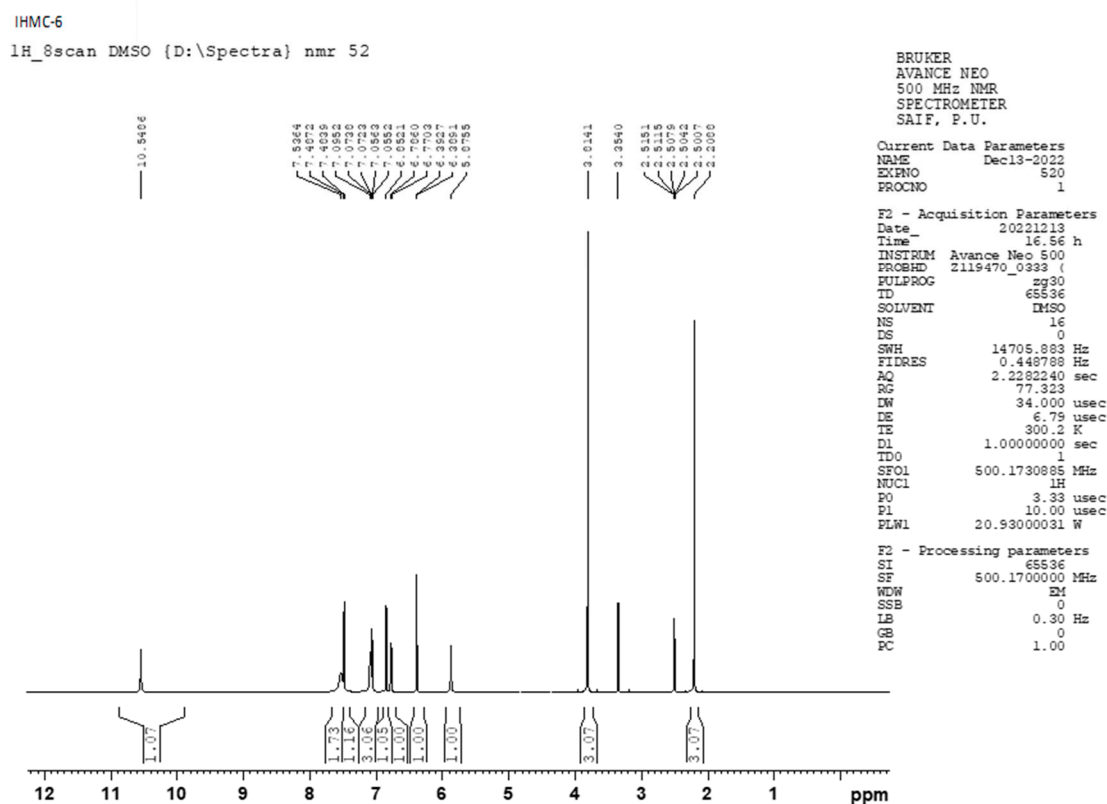

## 12.3. <sup>13</sup>C NMR OF IHMC-6

### IHMC-6

C13CPD DMSO {D:\Spectra} nmr 52

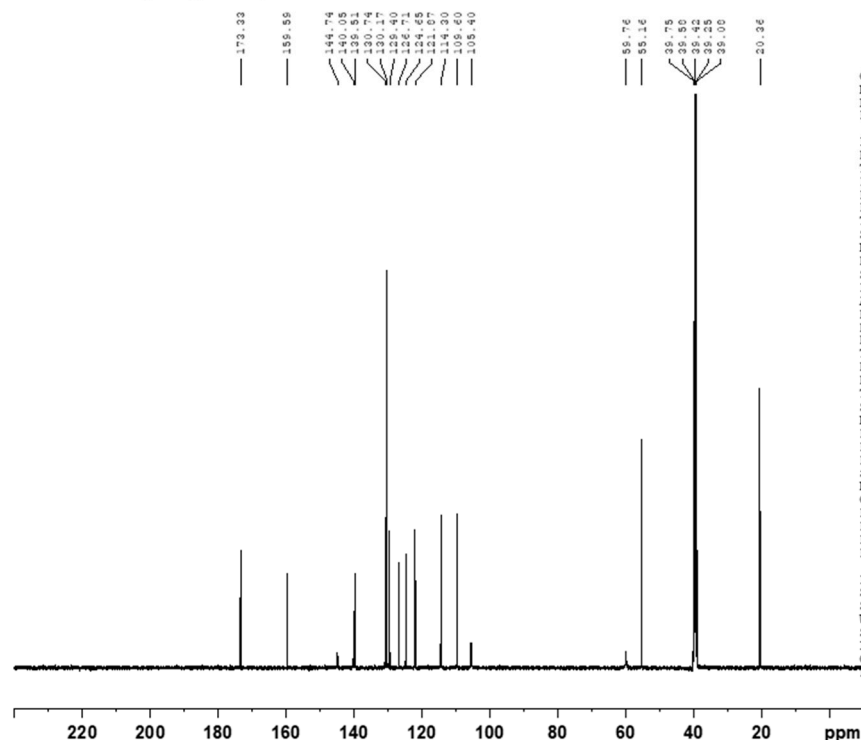

BRUKER  
AVANCE NEO  
500 MHz NMR SPECTROMETER  
SAIF, PANJAB UNIVERSITY,  
CHANDIGARH

Current Data Parameters  
NAME Dec13-2022  
EXPNO 521  
PROCNO 1

F2 - Acquisition Parameters  
Date\_ 20221214  
Time 8.13 h  
INSTRUM Avance Neo 500  
PROBHD Z119470\_0333 (   
PULPROG zgpg30  
TD 65536  
SOLVENT DMSO  
NS 512  
DS 4  
SWH 37037.035 Hz  
FIDRES 1.130281 Hz  
AQ 0.8847360 sec  
RG 101  
DW 13.500 usec  
DE 6.50 usec  
TE 300.1 K  
D1 2.00000000 sec  
D11 0.03000000 sec  
TD0 1  
SF01 125.7804233 MHz  
NUC1 13C  
FO 3.33 usec  
P1 10.00 usec  
PLW1 83.14099884 W  
SFO2 500.1720007 MHz  
NUC2 1H  
CFDPRG12 waltz65  
PCPD2 80.00 usec  
PLW2 20.93000031 W  
PLW12 0.32703000 W  
PLW13 0.16449000 W

F2 - Processing parameters  
SI 32768  
SF 125.7675206 MHz  
WDW EM  
SSB 0  
LB 1.00 Hz  
GB 0  
PC 1.40

## 12.4.MASS SPECTRUM OF IHMC-6

IHMC6

Scan 466 TIC=7903072 Base=89.5%FS #Ions=520 RT=12.67

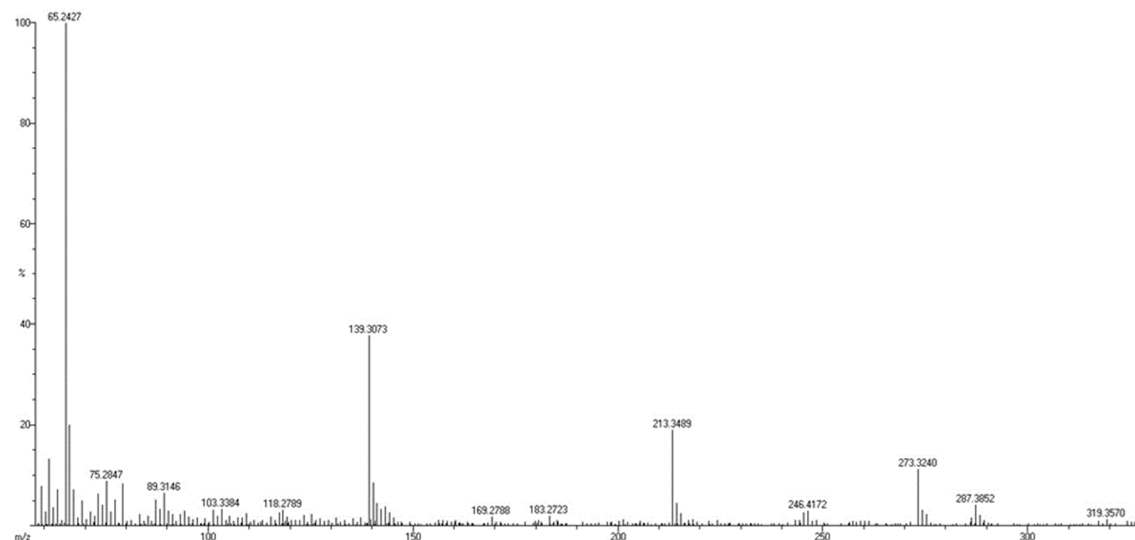

## 12.5.SPECTRUM INTERPRETATION

**(3Z)-3-((3-(4-methoxyphenyl)allylidene)hydrazineylidene)-5-methylindolin-2-one(IHMC-6)** <sup>1</sup>H NMR (500 MHz, DMSO)  $\delta$  10.55 (s, 1H,NH), 7.52-6.85 (m, 7H,Ar-H), 6.78 (d,1H,=CH-), 6.39 (d,1H,-CH-), 5.88 (s, 1H,-CH-), 3.81 (s, 3H, -OCH<sub>3</sub>), 2.21 (s, 3H,-CH<sub>3</sub>). <sup>13</sup>C NMR (500 MHz, DMSO)  $\delta$  173.33, 159.59, 144.74, 140.05, 139.51,130.74, 130.17,129.40,126.71, 124.65,121.87, 114.30,109.60, 105.40, 59.76, 55.16,20.36. Molecular formula: C<sub>19</sub>H<sub>17</sub>N<sub>3</sub>O<sub>2</sub>(HRMS) Calculated Mol.wt.= 319.36 Observed Mol.wt.= 319.3570.

**Figure S13.** IHNC-1 Structure

### 13. IHNC-1

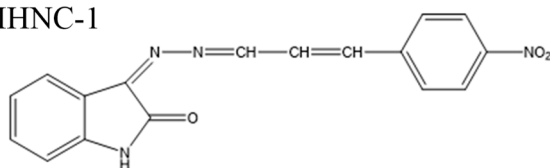

#### 13.1 TLC OF IHNC-1

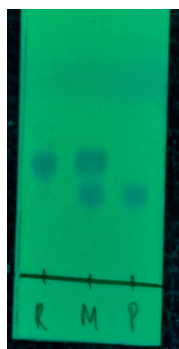

R = Reactant, M= Mixture, P = Product

#### 13.2. <sup>1</sup>H NMR OF IHNC-1

IHNC-1  
1H\_8scan DMSO {D:\Spectra} nmr 26

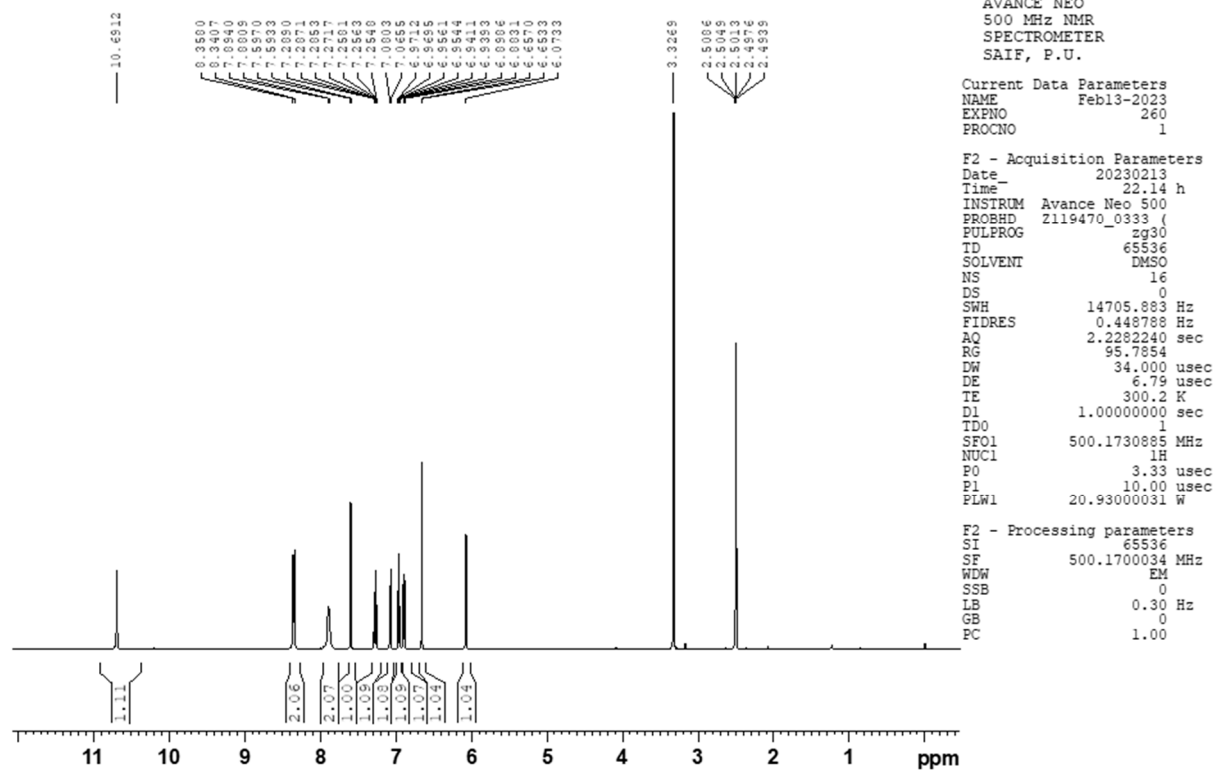

### 13.3. <sup>13</sup>C NMR OF IHNC-1

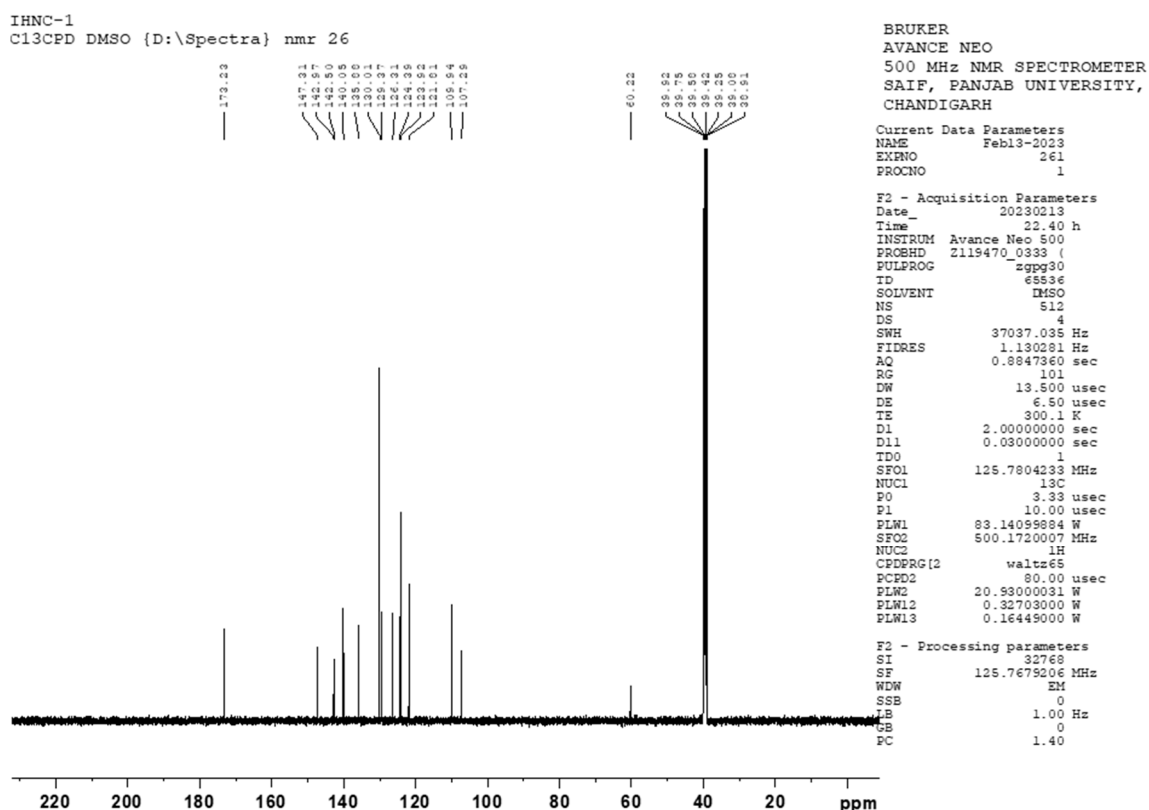

### 13.4. MASS SPECTRUM OF IHNC-1

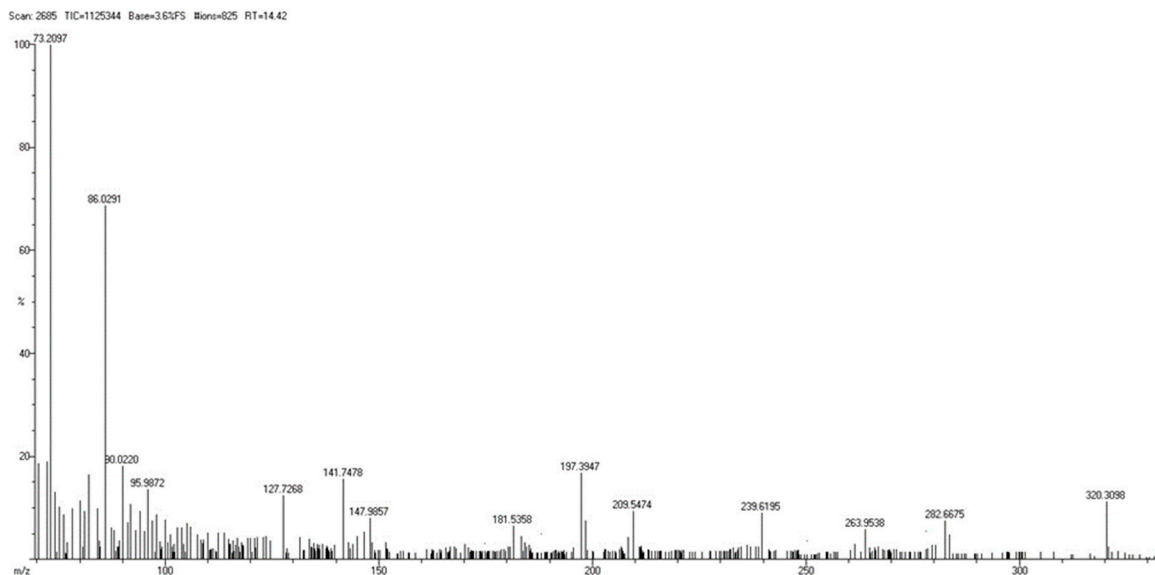

### 13.5. SPECTRUM INTERPRETATION

**(3Z)-3-((3-(4-nitrophenyl)allylidene)hydrazineylidene)indolin-2-one(IHNC-1)** <sup>1</sup>H NMR (500 MHz, DMSO) δ 10.69 (s, 1H, NH), 8.35-6.95 (m, 8H, Ar-H), 6.89 (d, 1H, =CH-), 6.66 (d, 1H, -CH-), 6.07 (s, 1H, -CH-). <sup>13</sup>C NMR (500 MHz, DMSO) δ 173.23, 147.31, 142.97, 142.50, 140.05, 135.88, 130.01, 129.37, 126.31, 124.39, 123.92, 121.81, 109.94, 107.29, 60.22. Molecular formula: C<sub>17</sub>H<sub>12</sub>N<sub>4</sub>O<sub>3</sub> (HRMS) Calculated Mol.wt. = 320.31 Observed Mol.wt. = 320.309

## Figure S14. IHNC-2 Structure

### 14. IHNC-2

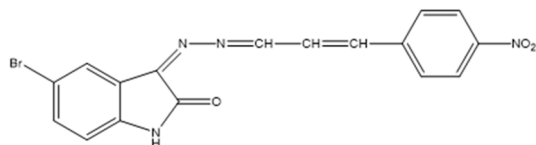

### 14.1 TLC OF IHNC-2

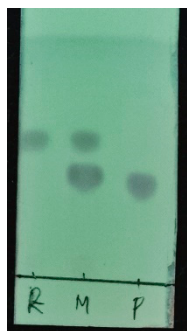

R = Reactant, M= Co-mixture, P = Product

### 14.2. <sup>1</sup>H NMR OF IHNC-2

IHNC-2

<sup>1</sup>H\_8scan DMSO {D:\Spectra} nmr 27

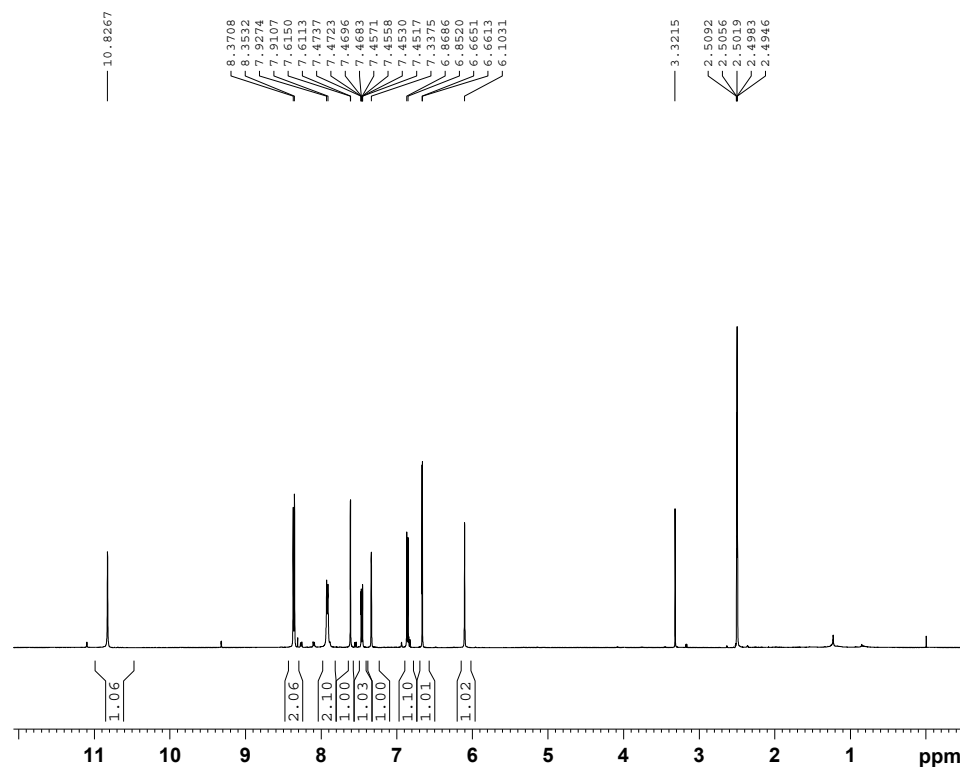

BRUKER  
AVANCE NEO  
500 MHz NMR  
SPECTROMETER  
SAIF, P.U.

Current Data Parameters  
NAME Feb13-2023  
EXPNO 270  
PROCNO 1

F2 - Acquisition Parameters  
Date\_ 20230213  
Time 22.43 h  
INSTRUM Avance Neo 500  
PROBHD Z119470\_0333 (  
PULPROG zg30  
TD 65536  
SOLVENT DMSO  
NS 16  
DS 0  
SWH 14705.883 Hz  
FIDRES 0.448788 Hz  
AQ 2.2282240 sec  
RG 101  
DW 34.000 usec  
DE 6.79 usec  
TE 300.2 K  
D1 1.00000000 sec  
TD0 1  
SFO1 500.1730885 MHz  
NUC1 1H  
PO 3.33 usec  
P1 10.00 usec  
PLW1 20.93000031 W

F2 - Processing parameters  
SI 65536  
SF 500.1700031 MHz  
WDW EM  
SSB 0  
LB 0.30 Hz  
GB 0  
PC 1.00

### 14.3. <sup>13</sup>C NMR OF IHNC-2

IHNC-2  
C13CPD DMSO {D:\Spectra} nmr 27

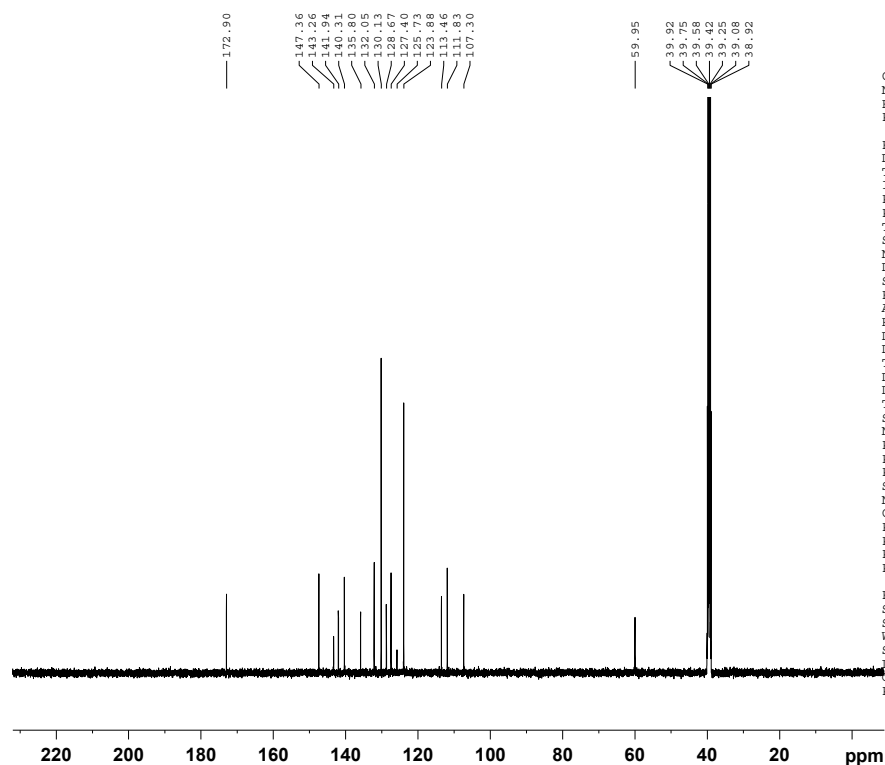

BRUKER  
AVANCE NEO  
500 MHz NMR SPECTROMETER  
SAIF, PANJAB UNIVERSITY,  
CHANDIGARH

Current Data Parameters  
NAME Feb13-2023  
EXPNO 271  
PROCNO 1

F2 - Acquisition Parameters  
Date\_ 20230213  
Time 23.08 h  
INSTRUM Avance Neo 500  
PROBHD Z119470\_0333  
PULPROG zgpg30  
TD 65536  
SOLVENT DMSO  
NS 512  
DS 4  
SWH 37037.035 Hz  
FIDRES 1.130281 Hz  
AQ 0.8847360 sec  
RG 101  
DW 13.500 usec  
DE 6.50 usec  
TE 300.1 K  
D1 2.00000000 sec  
D11 0.03000000 sec  
TD0 1  
SFO1 125.7804233 MHz  
NUC1 13C  
P0 3.33 usec  
P1 10.00 usec  
PLW1 83.14099884 W  
SFO2 500.1720007 MHz  
NUC2 1H  
CPDPRG2 waltz65  
PCPD2 80.00 usec  
PLW2 20.93000031 W  
PLW12 0.32703000 W  
PLW13 0.16449000 W

F2 - Processing parameters  
SI 32768  
SF 125.7679214 MHz  
WDW EM  
SSB 0  
LB 1.00 Hz  
GB 0  
PC 1.40

### 14.4. MASS SPECTRUM OF IHNC-2

Scan: 3092 TIC=1235456 Base=6.25FS Mono=745 RT=16.45

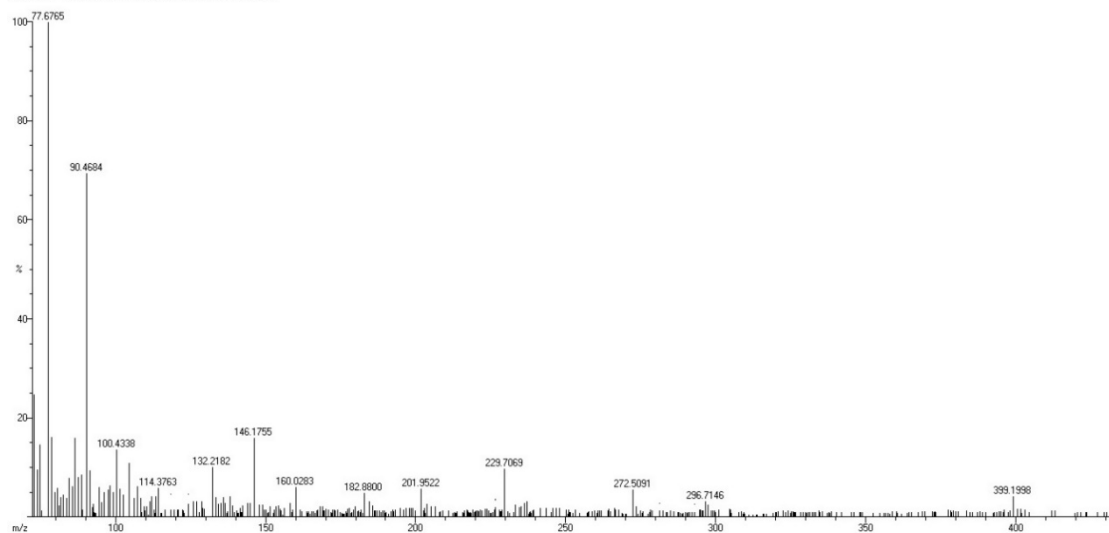

### 14.5. SPECTRUM INTERPRETATION

**(3Z)-5-bromo-3-((3-(4-nitrophenyl)allylidene)hydrazineylidene)indolin-2-one(IHNC-2)** <sup>1</sup>H NMR (500 MHz, DMSO) δ 10.83 (s, 1H, NH), 8.36-7.34(m, 7H, Ar-H), 6.96 (d, 1H, =CH-), 6.66 (d, 1H, -CH-), 6.10 (s, 1H, -CH-). <sup>13</sup>C NMR (500 MHz, DMSO) δ 172.90, 147.36, 143.26, 140.31, 135.80, 132.05, 130.13, 128.67, 127.40, 125.73, 123.88, 113.46, 111.83, 107.30, 59.95. Molecular formula: C<sub>17</sub>H<sub>11</sub>BrN<sub>4</sub>O<sub>3</sub> (HRMS) Calculated Mol.wt.= 399.20 Observed Mol.wt. = 399.199

**Figure S15.** IHNC-3 Structure

### 15. IHNC-3

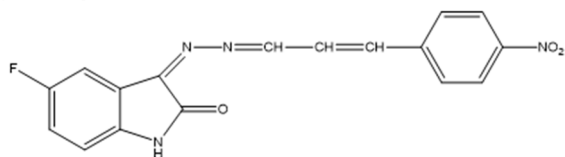

### 15.1 TLC OF IHNC-3

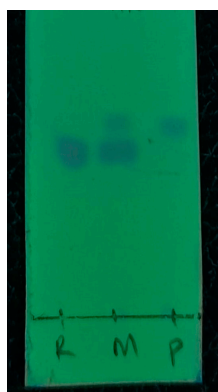

R = Reactant, M= Co-mixture, P = Product

### 15.2. <sup>1</sup>H NMR OF IHNC-3

IHNC-3  
1H\_8scan DMSO {D:\Spectra} nmr 28

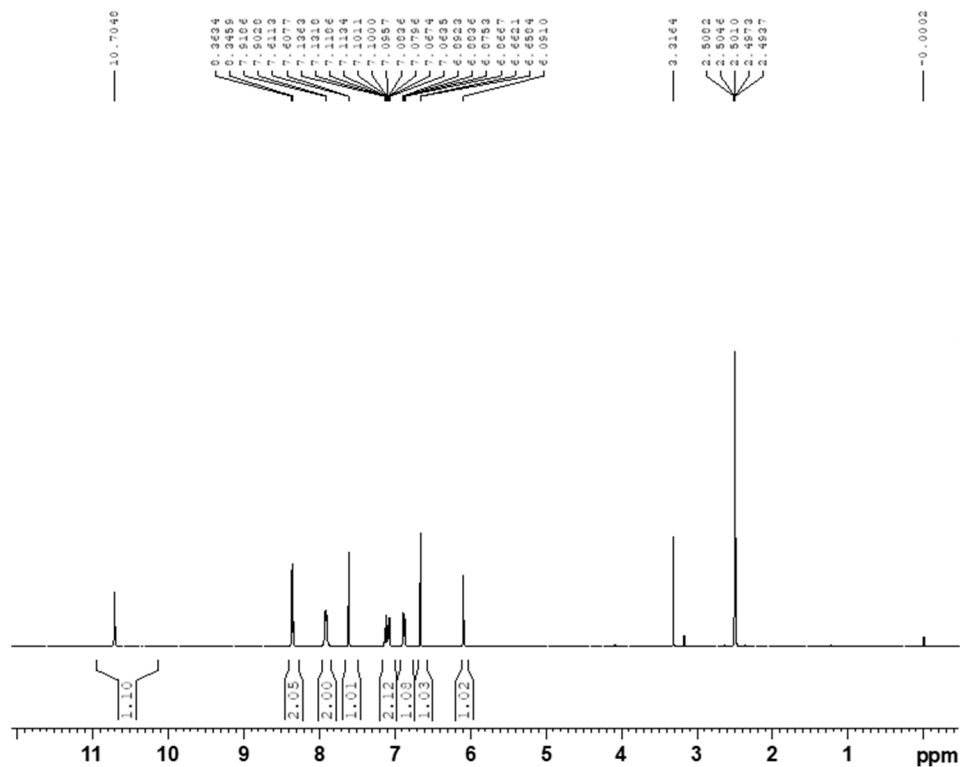

```

BRUKER
AVANCE NEO
500 MHz NMR
SPECTROMETER
SAIF, P.U.

Current Data Parameters
NAME      Feb13-2023
EXPNO     280
PROCNO    1

F2 - Acquisition Parameters
Date_     20230213
Time      23.10 h
INSTRUM   Avance Neo 500
PROBHD    Z119470_0333 (
PULPROG   zg30
TD         65536
SOLVENT    DMSO
NS         16
DS         0
SWH        14705.883 Hz
FIDRES     0.448788 Hz
AQ         2.2282240 sec
RG          101
DW         34.000 usec
DE         6.79 usec
TE         300.2 K
D1         1.00000000 sec
TD0         1
SF01       500.1730885 MHz
NUC1       1H
P0         3.33 usec
P1         10.00 usec
PLW1       20.93000031 W

F2 - Processing parameters
SI         65536
SF         500.1700036 MHz
WDW        EM
SSB        0
LB         0.30 Hz
GB         0
PC         1.00
    
```

### 15.3. <sup>13</sup>C NMR OF IHNC-3

IHNC-3  
C13CPD DMSO {D:\Spectra} nmr 28

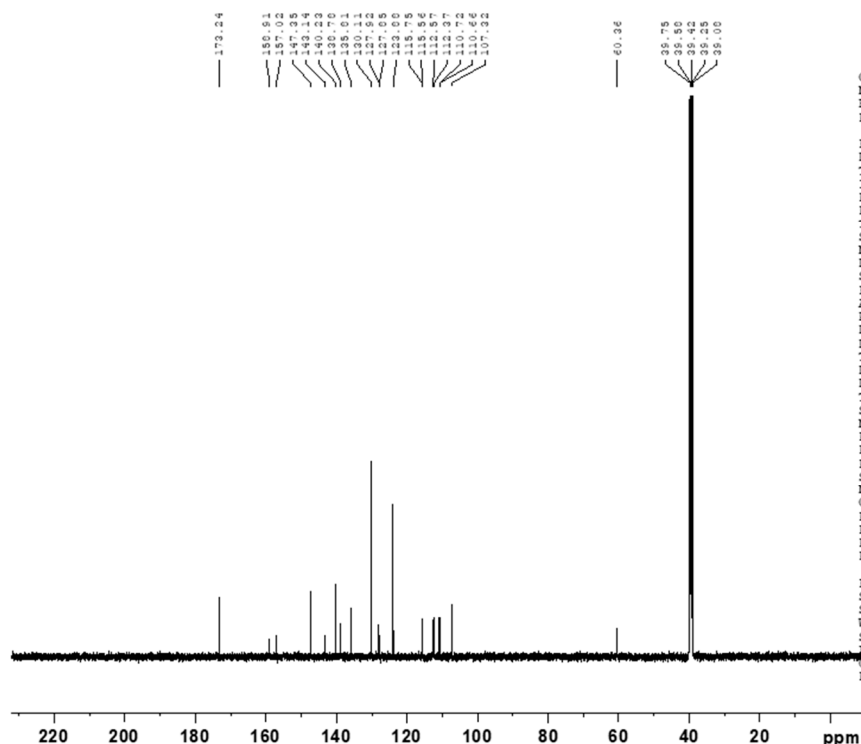

BRUKER  
AVANCE NEO  
500 MHz NMR SPECTROMETER  
SAIF, PANJAB UNIVERSITY,  
CHANDIGARH

Current Data Parameters  
NAME Feb13-2023  
EXPNO 281  
PROCNO 1

F2 - Acquisition Parameters  
Date\_ 20230213  
Time 23.36 h  
INSTRUM Avance Neo 500  
PROBHD Z119470.0333 (   
PULPROG zgpg30  
TD 65536  
SOLVENT DMSO  
NS 512  
DS 4  
SWH 37037.035 Hz  
FIDRES 1.130281 Hz  
AQ 0.8847360 sec  
RG 101  
DW 13.500 usec  
DE 6.50 usec  
TE 300.2 K  
D1 2.00000000 sec  
D11 0.03000000 sec  
TD0 1  
SF01 125.7804233 MHz  
NUC1 13C  
P0 3.33 usec  
P1 10.00 usec  
PLW1 83.14099884 W  
SFO2 500.1720007 MHz  
NUC2 1H  
CPDPRG2 waltz66  
PCPD2 80.00 usec  
PLW2 20.93000031 W  
PLW12 0.32703000 W  
PLW13 0.16449000 W

F2 - Processing parameters  
SI 32768  
SF 125.7679213 MHz  
WDW EM  
SSB 0  
LB 1.00 Hz  
GB 0  
PC 1.40

### 15.4.MASS SPECTRUM OF IHNC-3

Scan: 3325 TIC=1573792 Base=9.33e5 #Ions=550 RT=20.62

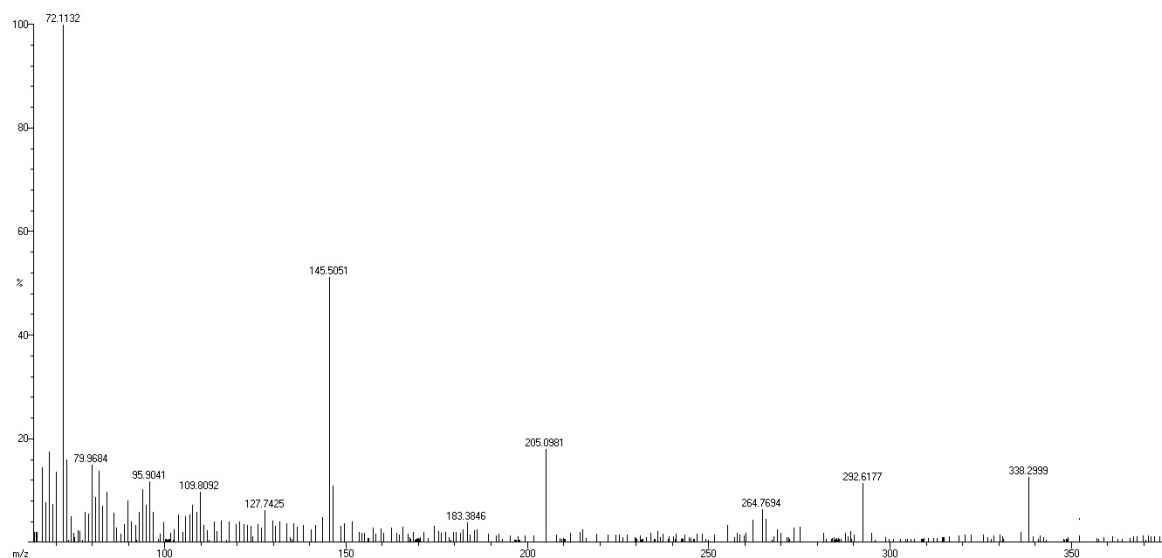

### 15.5.SPECTRUM INTERPRETATION

**(3Z)-5-fluoro-3-((3-(4-nitrophenyl)allylidene)hydrazineylidene)indolin-2-one(IHNC-3)** <sup>1</sup>H NMR (500 MHz, DMSO) δ 10.70 (s, 1H,NH), 8.35-6.81(m,8H,Ar-H,=CH) 6.66 (d,1H,-CH-), 6.09 (s, 1H,-CH-). <sup>13</sup>C NMR (500 MHz, DMSO) δ 173.24, 158.91, 157.02, 147.35, 143.14, 140.23, 138.78, 135.81, 130.11, 127.92, 123.88, 115.75, 112.57, 112.37, 110.72, 107.32, 60.36.Molecular formula: C<sub>17</sub>H<sub>11</sub>FN<sub>4</sub>O<sub>3</sub>(HRMS) Calculated Mol.wt. = 338.30 Observed Mol.wt. = 338.299

**Figure S16.** IHNC-4 Structure

## 16. IHNC-4

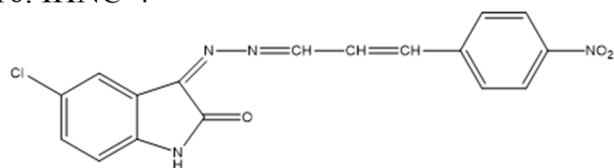

### 16.1 TLC OF IHNC-4

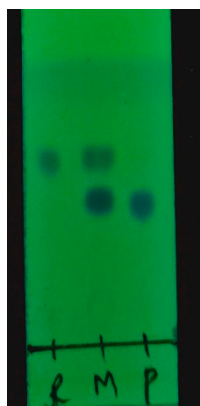

R = Reactant, M= Mixture, P = Product

### 16.2. <sup>1</sup>H NMR OF IHNC-4

IHNC-4

<sup>1</sup>H\_8scan DMSO {D:\Spectra} nmr 29

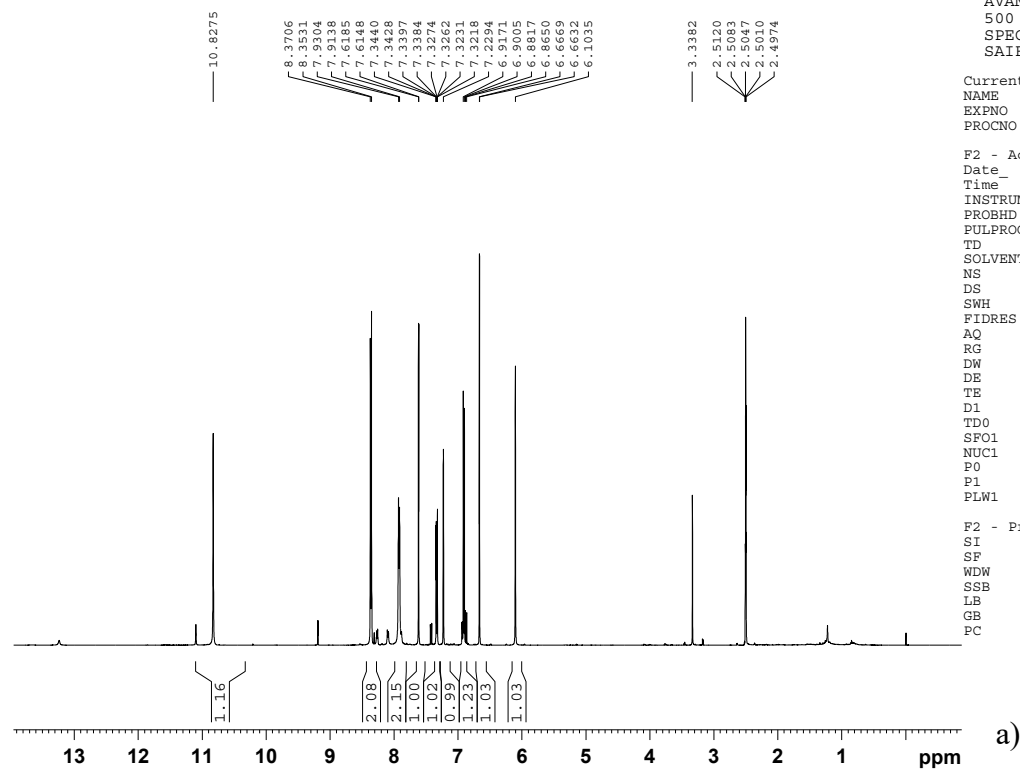

BRUKER  
AVANCE NEO  
500 MHz NMR  
SPECTROMETER  
SAIF, P.U.

Current Data Parameters  
NAME Feb13-2023  
EXPNO 290  
PROCNO 1

F2 - Acquisition Parameters  
Date\_ 20230213  
Time 23.38 h  
INSTRUM Avance Neo 500  
PROBHD Z119470\_0333 (4  
PULPROG zg30  
TD 65536  
SOLVENT DMSO  
NS 16  
DS 0  
SWH 14705.883 Hz  
FIDRES 0.448788 Hz  
AQ 2.2282240 sec  
RG 95.7854  
DW 34.000 usec  
DE 6.79 usec  
TE 300.2 K  
D1 1.00000000 sec  
TD0 1  
SFO1 500.1730885 MHz  
NUC1 1H  
P0 3.33 usec  
P1 10.00 usec  
PLW1 20.93000031 W

F2 - Processing parameters  
SI 65536  
SF 500.1700017 MHz  
WDW EM  
SSB 0  
LB 0.30 Hz  
GB 0  
PC 1.00

## 16.3. $^{13}\text{C}$ NMR OF IHNC-4

IHNC-4  
C13CPD DMSO {D:\Spectra} nmr 29

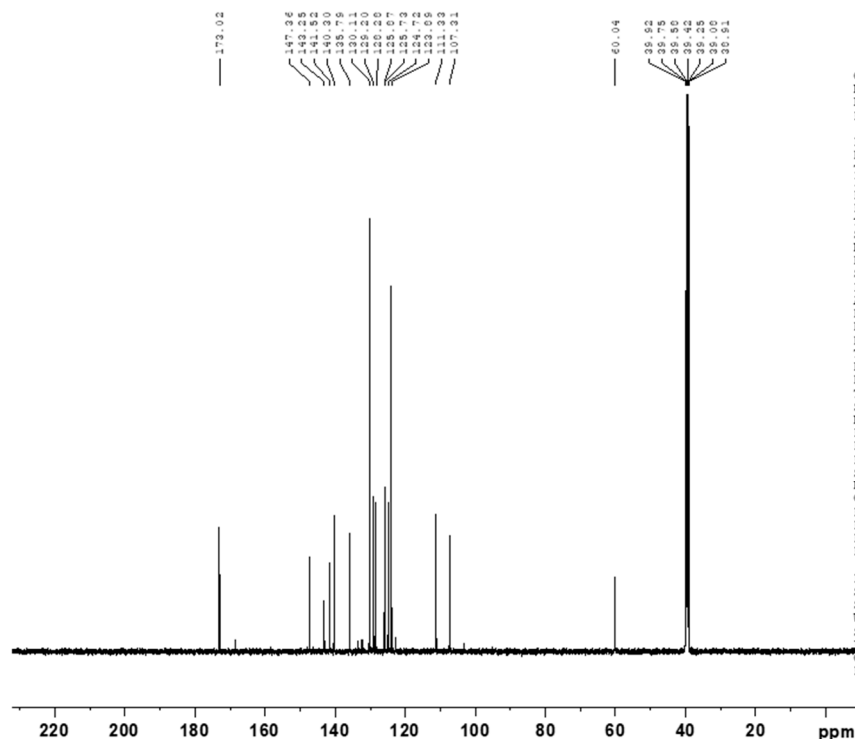

BRUKER  
AVANCE NEO  
500 MHz NMR SPECTROMETER  
SAIF, PANJAB UNIVERSITY,  
CHANDIGARH

Current Data Parameters  
NAME Feb13-2023  
EXPMO 291  
PROCNO 1

F2 - Acquisition Parameters  
Date\_ 20230214  
Time 0.04 h  
INSTRUM Avance Neo 500  
PROBHD 2119470\_0333 ( )  
PULPROG zgpg30  
TD 65536  
SOLVENT DMSO  
NS 512  
DS 4  
SWH 37037.035 Hz  
FIDRES 1.130281 Hz  
AQ 0.8847360 sec  
RG 101  
DW 13.500 usec  
DE 6.50 usec  
TE 300.1 K  
D1 2.00000000 sec  
D11 0.03000000 sec  
TDO 1  
SFO1 125.7804233 MHz  
NUC1 13C  
PO 3.33 usec  
PI 10.00 usec  
PLW1 93.14095884 W  
SFO2 500.1720007 MHz  
NUC2 1H  
CPDPRG2 waltz65  
PCPD2 80.00 usec  
PLW2 20.93000031 W  
PLW12 0.32703000 W  
PLW13 0.16449000 W

F2 - Processing parameters  
SI 32768  
SF 125.7675207 MHz  
WDW EM  
SSB 0  
LB 1.00 Hz  
GB 0  
PC 1.40

## 16.4. MASS SPECTRUM OF IHNC-4

Scan: 3668 TIC=1663232 Base=8.4%FS #Ions=562 RT=19.34

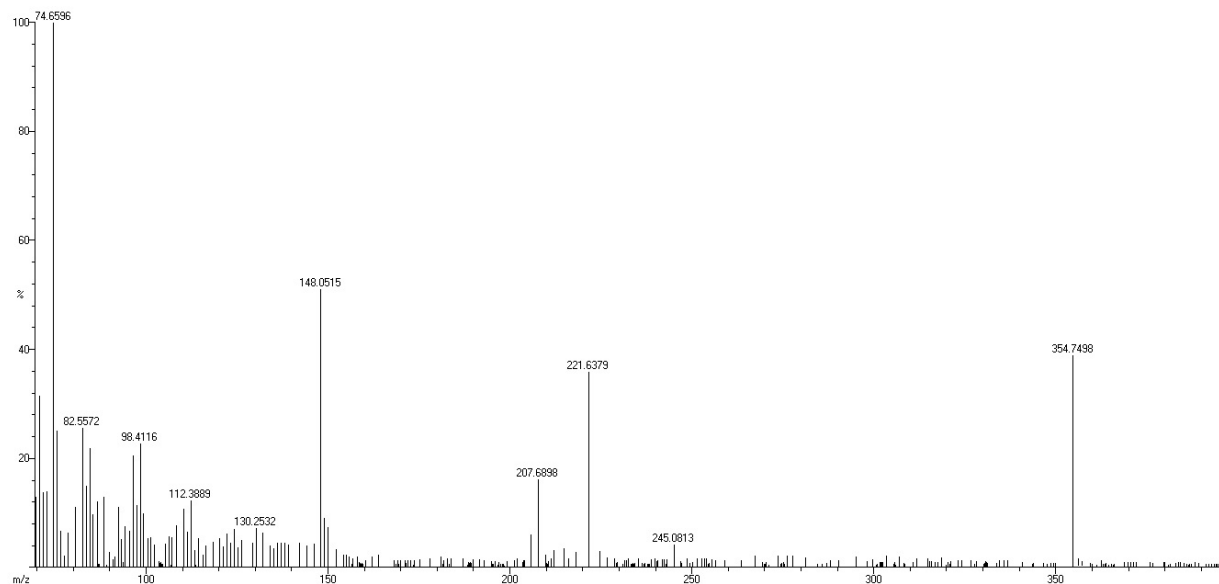

## 16.5. SPECTRUM INTERPRETATION

**(3Z)-5-chloro-3-((3-(4-nitrophenyl)allylidene)hydrazineylidene)indolin-2-one(IHNC-4)**  $^1\text{H}$  NMR (500 MHz, DMSO)  $\delta$  10.83 (s, 1H, NH), 8.36 (m, 8H, Ar-H, =CH-), 6.67 (d, 1H, -CH-), 6.10 (s, 1H, -CH-)  $^{13}\text{C}$  NMR (500 MHz, DMSO)  $\delta$  173.02, 147.36, 143.25, 141.30, 140.30, 135.79, 130.11, 129.20, 128.20, 128.28, 125.87, 125.73, 124.72, 123.89, 111.33, 107.31, 60.04. Molecular formula:  $\text{C}_{17}\text{H}_{11}\text{ClN}_4\text{O}_3$  (HRMS) Calculated Mol.wt. = 354.75 Observed Mol.wt. = 354.749

## Figure S17. IHNC-17 Structure

### 17. IHNC-5

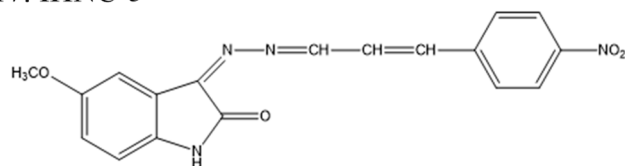

### 17.1 TLC OF IHNC-5

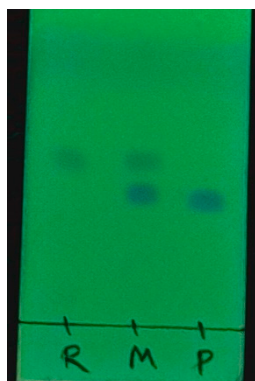

R = Reactant, M= Mixture, P = Product

### 17.2. <sup>1</sup>H NMR OF IHNC-5

IHNC-5

<sup>1</sup>H\_8scan DMSO {D:\Spectra} nmr 30

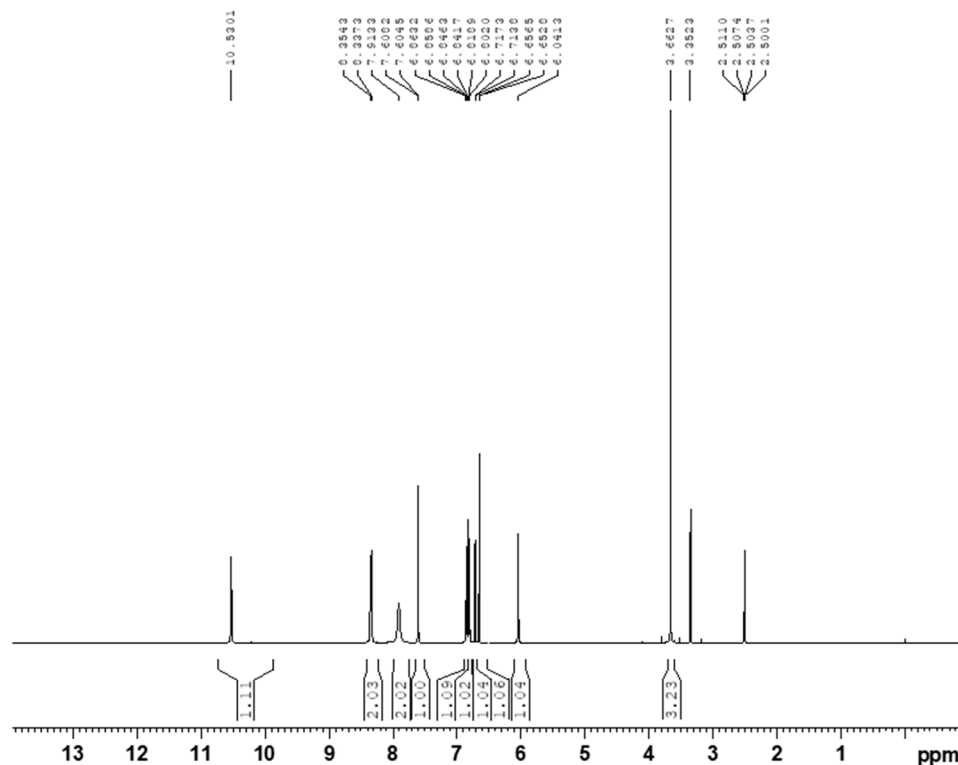

BRUKER  
AVANCE NEO  
500 MHz NMR  
SPECTROMETER  
SAIF, P.U.

Current Data Parameters  
NAME Feb13-2023  
EXPNO 300  
PROCNO 1

F2 - Acquisition Parameters  
Date\_ 20230214  
Time 0.06 h  
INSTRUM Avance Neo 500  
PROBHD Z119470\_0333 (4  
PULPROG zg30  
TD 65536  
SOLVENT DMSO  
NS 16  
DS 0  
SWH 14705.883 Hz  
FIDRES 0.448788 Hz  
AQ 2.2282240 sec  
RG 95.7854  
DW 34.000 usec  
DE 6.79 usec  
TE 300.2 K  
D1 1.00000000 sec  
TD0 1  
SFO1 500.1730885 MHz  
NUC1 1H  
P0 3.33 usec  
P1 10.00 usec  
PLW1 20.93000031 W

F2 - Processing parameters  
SI 65536  
SF 500.1700022 MHz  
WDW EM  
SSB 0  
LB 0.30 Hz  
GB 0  
PC 1.00

### 17.3. $^{13}\text{C}$ NMR OF IHNC-5

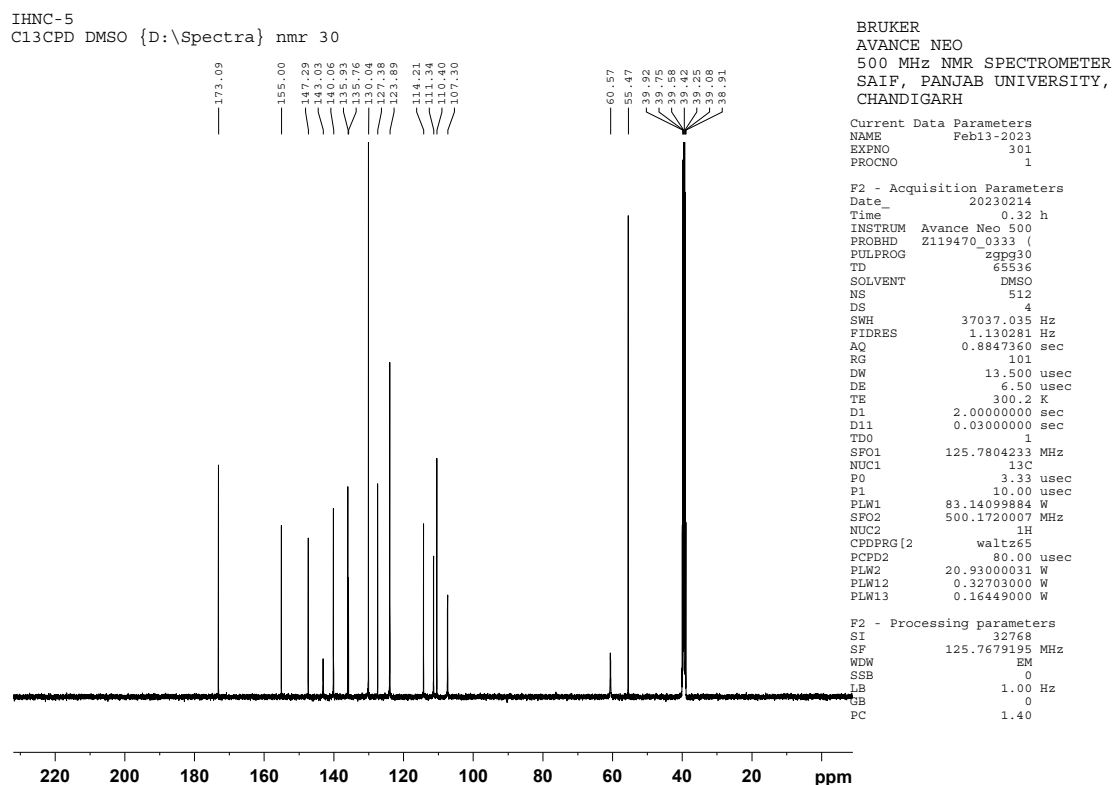

### 17.4. MASS SPECTRUM OF IHNC-5

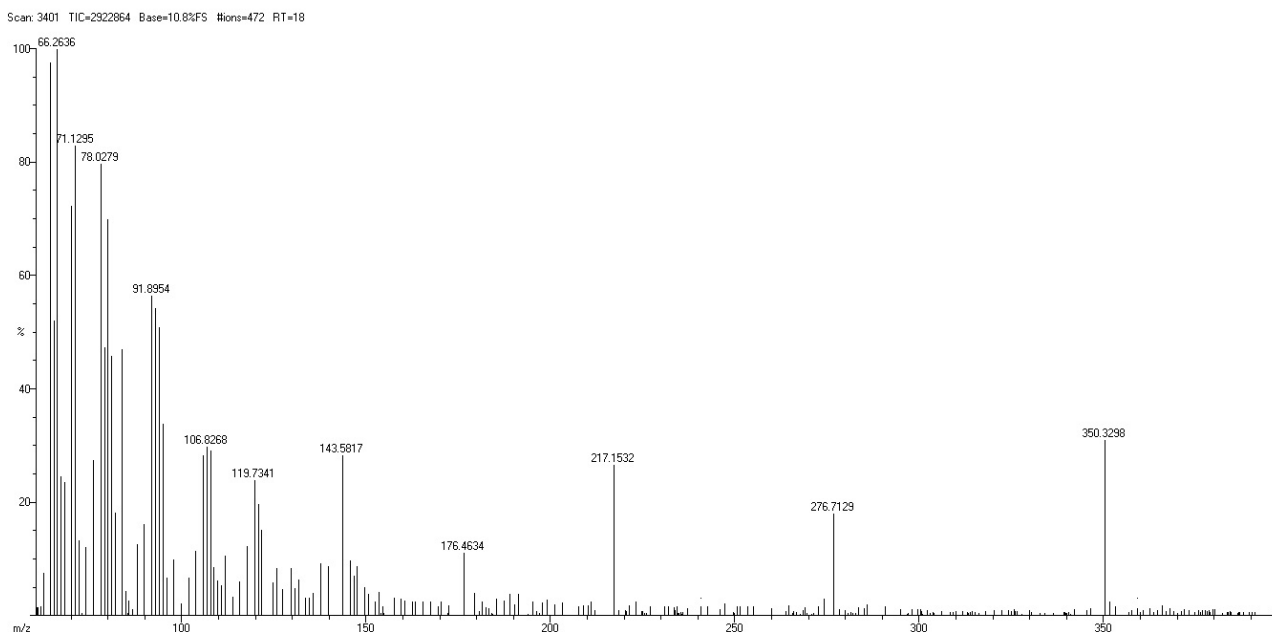

### 17.5. SPECTRUM INTERPRETATION

**(3Z)-5-methoxy-3-((3-(4-nitrophenyl)allylidene)hydrazineylidene)indolin-2-one(IHNC-5)**  $^1\text{H}$  NMR (500 MHz, DMSO)  $\delta$  10.53 (s, 1H, NH), 8.33-6.72 (m, 7H, Ar-H), 6.81 (d, 1H, =CH-), 6.65 (d, 1H, -CH-), 6.04 (s, 1H, -CH-), 3.66 (s, 3H, -OCH<sub>3</sub>).  $^{13}\text{C}$  NMR (500 MHz, DMSO)  $\delta$  173.09, 155, 147.29, 143.03, 140.06, 135.93, 135.76, 130.04, 127.38, 123.84, 114.21, 111.34, 110.40, 107.30, 60.57, 55.47. Molecular formula: C<sub>18</sub>H<sub>14</sub>N<sub>4</sub>O<sub>4</sub>(HRMS) Calculated Mol.wt. = 350.33 Observed Mol.wt. = 350.329

## Figure S18. IHNC-6 Structure

### 18. IHNC-6

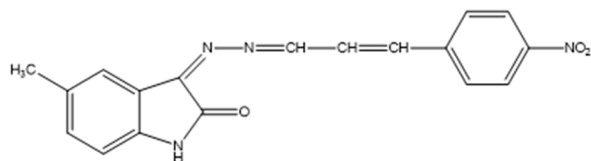

### 18.1 TLC OF IHNC-6

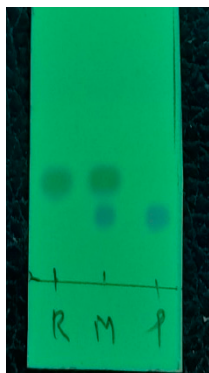

R = Reactant, M= Mixture, P = Product

### 18.2. <sup>1</sup>H NMR OF IHNC-6

IHNC-6  
1H\_8scan DMSO {D:\Spectra} nmr 31

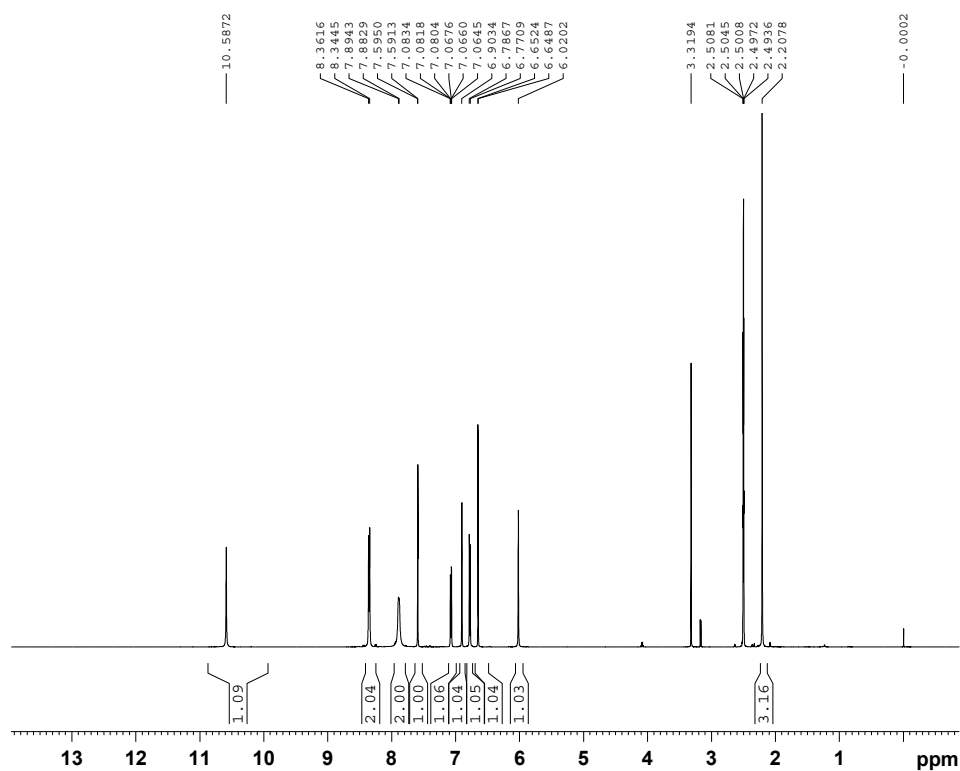

BRUKER  
AVANCE NEO  
500 MHz NMR  
SPECTROMETER  
SAIF, P.U.

Current Data Parameters  
NAME Feb13-2023  
EXPNO 310  
PROCNO 1

F2 - Acquisition Parameters  
Date\_ 20230214  
Time\_ 0.34 h  
INSTRUM Avance Neo 500  
PROBHD Z119470\_0333 (  
PULPROG zg30  
TD 65536  
SOLVENT DMSO  
NS 16  
DS 0  
SWH 14705.883 Hz  
FIDRES 0.448788 Hz  
AQ 2.2282240 sec  
RG 101  
DW 34.000 usec  
DE 6.79 usec  
TE 300.2 K  
D1 1.00000000 sec  
TD0 1  
SF01 500.1730885 MHz  
NUC1 1H  
P0 3.33 usec  
P1 10.00 usec  
PLW1 20.93000031 W

F2 - Processing parameters  
SI 65536  
SF 500.1700037 MHz  
WDW EM  
SSB 0  
LB 0.30 Hz  
GB 0  
PC 1.00

### 18.3. <sup>13</sup>C NMR OF IHNC-6

IHNC-6  
C13CPD DMSO {D:\Spectra} nmr 31

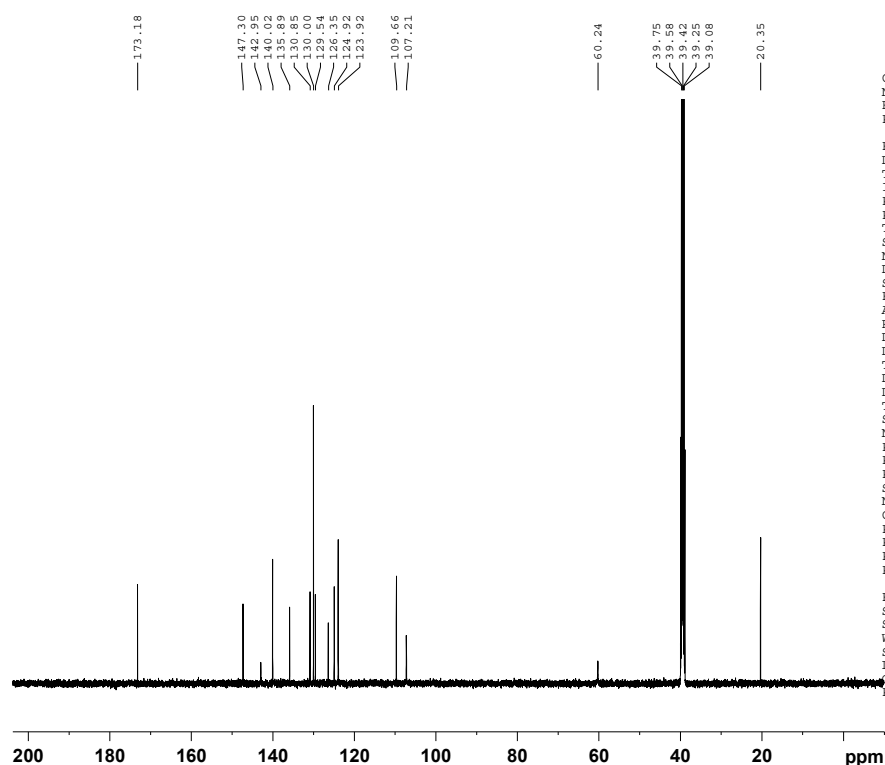

BRUKER  
AVANCE NEO  
500 MHz NMR SPECTROMETER  
SAIF, PANJAB UNIVERSITY,  
CHANDIGARH

Current Data Parameters  
NAME Feb13-2023  
EXPNO 311  
PROCNO 1  
  
F2 - Acquisition Parameters  
Date\_ 20230214  
Time\_ 1.00 h  
INSTRUM Avance Neo 500  
PROBHD Z119470\_0333 (  
PULPROG zgpg30  
TD 65536  
SOLVENT DMSO  
NS 512  
DS 4  
SWH 37037.035 Hz  
FIDRES 1.130281 Hz  
AQ 0.8847360 sec  
RG 101  
DW 13.500 usec  
DE 6.50 usec  
TE 300.2 K  
D1 2.00000000 sec  
D11 0.03000000 sec  
TD0 1  
SFO1 125.7804233 MHz  
NUC1 13C  
P0 3.33 usec  
P1 10.00 usec  
PLW1 83.14099884 W  
SFO2 500.1720007 MHz  
NUC2 1H  
CPDPRG2 waltz65  
PCPD2 80.00 usec  
PLW2 20.93000031 W  
PLW12 0.32703000 W  
PLW13 0.16449000 W  
  
F2 - Processing parameters  
SI 32768  
SF 125.7679213 MHz  
WDW EM  
SSB 0  
LB 1.00 Hz  
GB 0  
PC 1.40

### 18.4. MASS SPECTRUM OF IHNC-6

Scan: 3327 TIC=1454704 Base=6.6%FS #Ions=538 RT=20.63

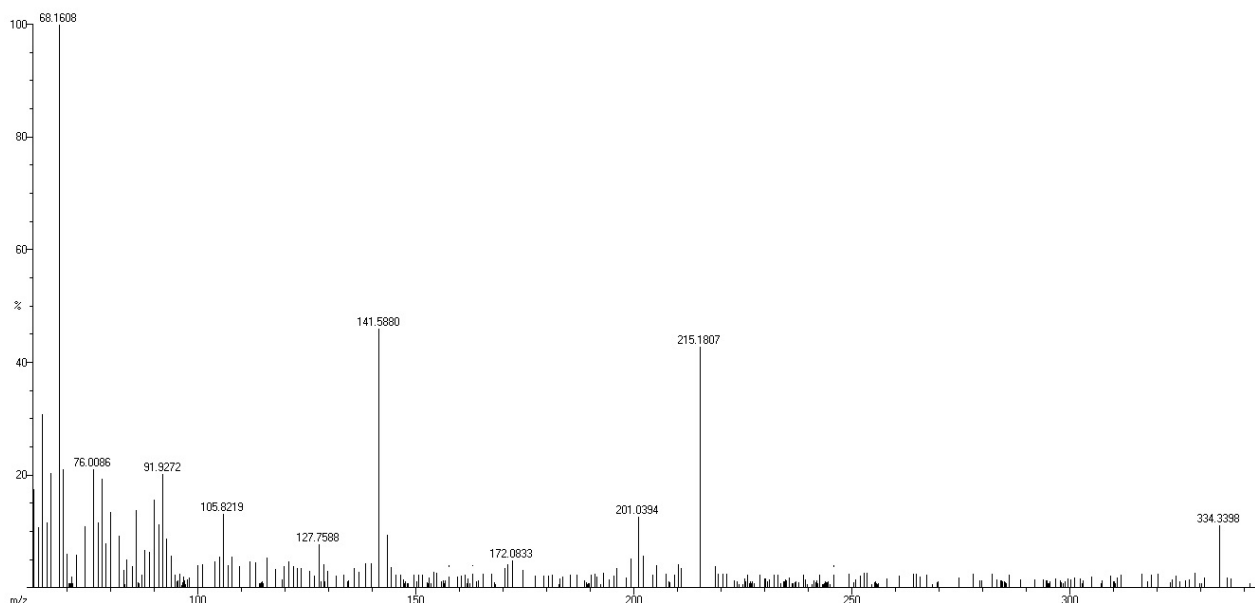

### 18.5. SPECTRUM INTERPRETATION

**(3Z)-5-methyl-3-((3-(4-nitrophenyl)allylidene)hydrazineylidene)indolin-2-one(IHNC-6)**<sup>1</sup>H NMR (500 MHz, DMSO)  $\delta$  10.59 (s, 1H, NH), 8.32 (m, 7H, Ar-H), 6.78 (d, 1H, =CH-), 6.65 (d, 1H, -CH-), 6.02 (s, 1H, -CH-), 2.21 (s, 3H, -CH<sub>3</sub>). <sup>13</sup>C NMR (500 MHz, DMSO)  $\delta$  173.18, 147.30, 142.95, 140.02, 135.89, 130.85, 130, 129.54, 126.35, 124.92, 123.92, 109.66, 107.21, 60.24, 20.35. Molecular Formula: C<sub>18</sub>H<sub>14</sub>N<sub>4</sub>O<sub>3</sub>(HRMS) Calculated Mol.wt. = 334.34 Observed Mol.wt. = 334.339.

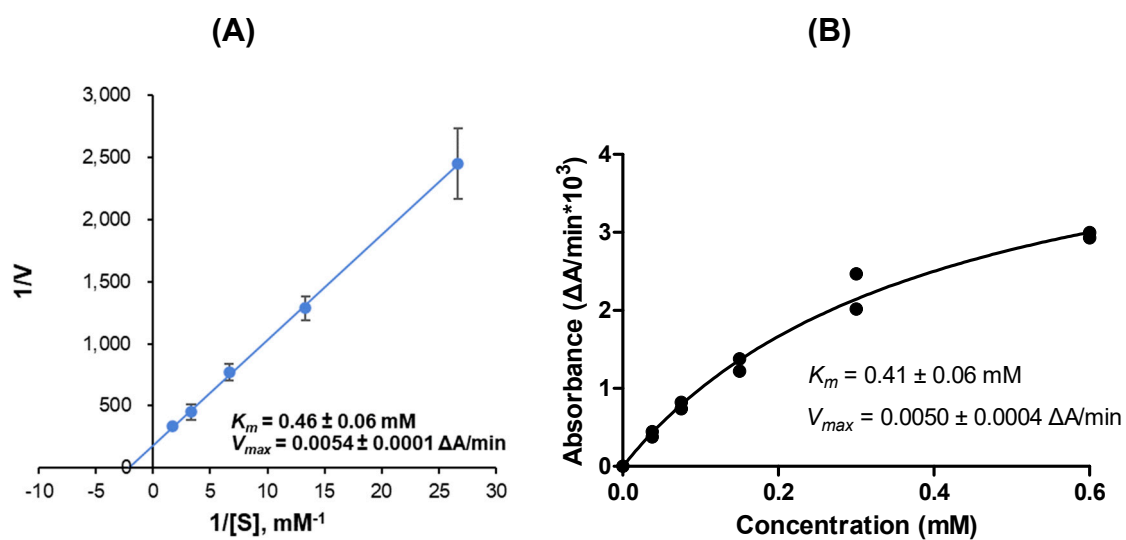

**Figure S19.** Lineweaver-Burk plot (A) and nonlinear regression of Michaelis-Menten equation analyzed by Prism 5.0 (B) for MAO-B kinetics.
